# Supplementary material for: Prevalence of Hantaviruses Harbored by Murid Rodents in Northwestern Ukraine and Discovery of a Novel Puumala Virus Strain
Source: MDPI journal article supplement (doi:10.3390/v13081640), 2021-08-18
Supplement: s1 [file s1]

**Table S4.** Primers used to amplify DOBV or PUUV hantaviruses. DOBV primers were designed based on an alignment of sequences from Russia, Germany, Slovenia, Slovakia, Croatia, Estonia, Greece, Finland from Apodemus agrarius and A. flavicollis rodents and Homo sapiens hosts. PUUV primers were designed based on alignments from sequences collected from Russia, Germany, Slovenia, Slovakia, Finland, France, Czech Republic. The optimal annealing temperature for these primers is set at 60°C.

| PUUV Small Segment Primers |                |                                         |                |                                |
|----------------------------|----------------|-----------------------------------------|----------------|--------------------------------|
| No.                        | Forward Primer | Forward Primer Sequence                 | Reverse Primer | Reverse Primer Sequence        |
| 1                          | 1-30F          | TAG TAG TAG ACT CCT TGA AAA GCT ACT ACG | 538-563R       | GGTCTYCTRATRCCTTRATRTCCTC      |
| 2                          |                |                                         | 958-980R       | GCAAAKACCCAWGGKGCATTAGG        |
| 3                          | 382-404F       | GGYCARACAGCAGAYTTGGTATAC                | 1891-1920R     | TAGTAGTAGACTCCTTGAAAAGCAATCAAG |
| 4                          | 883-910F       | CATGTGGCGGAYATYGATAAGTTTRATTG           |                |                                |

| PUUV Medium Segment Primers |                |                                    |                |                                     |
|-----------------------------|----------------|------------------------------------|----------------|-------------------------------------|
| No.                         | Forward Primer | Forward Primer Sequence            | Reverse Primer | Reverse Primer Sequence             |
| 1                           | 1-26F          | TAG TAG TAG ACT CCG CAA GAA GAA GC | 499-525R       | GTGTATTATRCAWGTYTGDATAGGTCCC        |
| 2                           |                |                                    | 999-1023R      | CCTGAAAATGCAATMCCYTGTACTG           |
| 3                           | 467-490F       | CARACAGYRTGTARCCTACTGTCT           | 1691-1715R     | GACASACTTCACAWACCATKGARCC           |
| 4                           | 990-1014F      | GAATCATCWGAYACAGTACARGGKATWGC      | 2040-2061R     | GATCCATGTGCTGTRTCWGTCC              |
| 5                           | 1691-1715F     | GGYTCMATGGTWTGTGAAGTSTGTC          | 2754-2774R     | GTYTGVCWGTGCCMARYTGAATGC            |
| 6                           | 2040-2061F     | GGACWGAACGACATGGATC                | 3092-3117R     | CATAACACATWGCWGMRTCACAKGC           |
| 7                           | 2397-2419F     | GGMTGTACWGCWTGTGGTGTWTAY           | 3656-3682R     | TAG TAG TAG RCT CCG CAR CAA CAA AAG |
| 8                           | 2997-3021F     | CWATWGATGGGCAUAGGGGTTTC            |                |                                     |

| PUUV Large Segment Primers |                |                                         |                |                                  |
|----------------------------|----------------|-----------------------------------------|----------------|----------------------------------|
| No.                        | Forward Primer | Forward Primer Sequence                 | Reverse Primer | Reverse Primer Sequence          |
| 1                          | 1-26F          | TAG TAG TAG ACT CCG AGA TAG AGA AR      | 542-563R       | CCATCWGTYCTWAYWGCYACCAC          |
| 2                          |                |                                         | 1170-1198R     | CATCAATTARTGCYTTTGAYTTWGGATCC    |
| 3                          | 542-563F       | GTGGTRGCWRTWAGRACWGATGG                 | 1498-1520R     | GATCTYTTAAGCCCTGCATGTGC          |
| 4                          | 871-898F       | GCATCMAARTATGGACAYTCWAGAAAGC            | 1927-1952R     | CCAGARTAKGTAGATGTRACWGTGCG       |
| 5                          | 1498-1520F     | GCACATGCAGGGCTTAARAGATC                 | 2542-2567R     | GCTAAATGACCATCTCTYTGTAATGC       |
| 6                          | 1927-1952F     | CCAGCWGTYACATCTACMTAYTCTGG              | 3047-3076R     | CATAWATRTTYCTTARGGCATCAACTACAC   |
| 7                          | 2542-2567F     | GCATTACARGAAGTGGTCATTTAGC               | 3429-3453R     | CCACATYTCYTGATTMACAGCATGC        |
| 8                          | 3047-3076F     | GTG TAG TTG ATG CCY TAA GRA AYA TWT ATG | 4036-4061R     | GTRAAVACTTTCATTGWACITTTCCC       |
| 9                          | 3429-3453F     | GCATGCTGKAATCARGARATGTGG                | 4423-4450R     | GTACTTCATTYARRAARTCTCTCCAKGC     |
| 10                         | 4036-4061F     | GGGAAAGTWCAATGGAAAGTRTTYAC              | 4915-4939R     | CYTCRATRCATARTCTCATTGCAGC        |
| 11                         | 4423-4450F     | GCMTGGAGAGAYTTYTRAATGAAGTAC             | 5568-5591R     | GGATTYTCTTCATCWAGYTGTCGC         |
| 12                         | 4915-4939F     | GCTGCAATGAGAYTATGYATYGARG               | 6064-6088R     | CTCCAGTRTAAGCWGAYTCATCYTG        |
| 13                         | 5568-5591F     | GGCACARCTWGATGAAGARAATCC                | 6527-6550R     | GA GAA AAG AGC CTC GTA TGA TGA T |
| 14                         | 6064-6088F     | CARGATGARTCWGCTTAYACTGGAG               |                |                                  |

Reference sequences included: S-segment (M32750, KT885052, L08804, JQ319168, JQ319171, KY364995, KT247592, JN831943, JN657232, FN377821, KY364998, KT247597, KY365001, KT247594, KY364996), M-segment (KT885051, L08754, HE801634, JQ319175, KT247602, KT247600, KJ994777, MF077609, MF077578, MF077580, MF077574, AJ888741, AJ888742), L-segment (KT885050, EF405801, NC\_005225, KT247608, KT247606, Z66548, JN831945, KJ994778, KR047483, MF077569, MF077567, KF776674, KF776670)

| DOBV Small Segment Primers |                |                                   |                |                                     |
|----------------------------|----------------|-----------------------------------|----------------|-------------------------------------|
| No.                        | Forward Primer | Forward Primer Sequence           | Reverse Primer | Reverse Primer Sequence             |
| 1                          | 1-30F          | TAGTAGTAGRCTCCCTAAARAGCACTAYAC    | 572-595R       | CTR GAY TGD GCA TTR GGC ATT GAC     |
| 2                          |                |                                   | 988-1011R      | CCATGCCTGCAATRAACAGGCAGG            |
| 3                          | 515-539F       | GGA TGA CAG CTC DTT YGA RGA TGT G | 1687-1721R     | TAGTAGTAGRCTCCCTAAAAAGACATTCAGGAAGC |
| 4                          | 1033-1057F     | CTG TCC TYC AGG AYA TGA GGA AYA C |                |                                     |

| DOBV Medium Segment Primers |                |                                       |                |                                     |
|-----------------------------|----------------|---------------------------------------|----------------|-------------------------------------|
| No.                         | Forward Primer | Forward Primer Sequence               | Reverse Primer | Reverse Primer Sequence             |
| 1                           | 1-25F          | TAG TAG TAG ACT CCG CAA GAA AYA G     | 584-608R       | GGTCTGGYACAAARCAYYTCCCTTC           |
| 2                           |                |                                       | 1139-1164R     | GGA CCG ATR ATA CTT TGT CAR GTG GG  |
| 3                           | 457-480F       | GCC AAC GAT GCA TAT GAT TGT KCC       | 1496-1520R     | C AAA GCA GAA TGT RGT GAG RAG AGC   |
| 4                           | 962-984F       | GCA GCA AAY ATG CTV YTY ACT GC        | 2010-2033R     | CAA CAC CAT GTG CRT TGT CAT TCC     |
| 5                           | 1430-1452F     | CCT GKG GTA GCA CAT TCW ATT GC        | 2549-2574R     | GGT ATC ACC TTG TGA GAA CTT TGA AAC |
| 6                           | 1860-1881      | CAC CTC ART CWA CAA GVC CDG G         | 3212-3233R     | C YAR RTG YGG WGC RCT WGC TTG       |
| 7                           | 2438-2465      | GTY CGT TAY AGY MGB AAA GTN TGT GTY C | 3620-3644R     | TAGTAGTAKRCTCCGCARGATATAG           |
| 8                           | 2873-2899F     | GATGGRATGCTTAARGACCAHYHTCAAY          |                |                                     |

| DOBV Large Segment Primers |                |                                      |                |                                       |
|----------------------------|----------------|--------------------------------------|----------------|---------------------------------------|
| No.                        | Forward Primer | Forward Primer Sequence              | Reverse Primer | Reverse Primer Sequence               |
| 1                          | 1-30F          | TAGTAGTAGACTCCGGAARAGACAARYTAC       | 569-593R       | G CCT CAT GTA TTG AAC AAC ACC ATC     |
| 2                          |                |                                      | 1097-1119R     | GG TAT GAA YTG GGT TTT GGG TGC        |
| 3                          | 412-439F       | GCT TAA GTA TGA GGC AGG RYT AAA GTAC | 1598-1625R     | C TGT YAC AAA CCT TAT ATA AGA CCC TGC |
| 4                          | 950-974F       | GCT ACA ATY CTT TCT GAY CAR GTH G    | 2118-2140R     | GT AAA TCC CAC TTG CWC CRA CAG        |
| 5                          | 1452-1476F     | CAT GGC ATM TTG GGC AYC TYA TTM G    | 2567-2592R     | C TAC AGC AGC AAG TTC TAC AGC ATC     |
| 6                          | 1928-1953F     | CCT GCT GTY ACA TCW CTT TAC TCT GG   | 3228-3253R     | CATYCKACACCCRAAAAGAGATGAAC            |
| 7                          | 2536-2559F     | GTC AGG HCA RGT TCA RGA AGA TGG      | 3566-3589R     | KGG KAT TGA YAC AGC ACA DCY TTC       |
| 8                          | 2948-2970F     | GCT GAT GCA ACR AAA TGG TCT CC       | 4218-4241R     | KGK GTG AYT GCA TTG TCA TRG CAG       |
| 9                          | 3566-3589F     | GAA RGH TGT GCT GTR TCA ATM CCM      | 4694-4719R     | GG TGC AAC YTT YTT CAT YAC YTC AGC    |
| 10                         | 4037-4062F     | CAR CAT GAA AGR YTR GGY GAR TTY TC   | 5096-5118R     | GC AGC ACA YTG RAT YTC TGG RTC        |
| 11                         | 4571-4598F     | GCAGTVACAGTTGATGAAATGTCAGATG         | 5750-5769R     | GC AGG AGG TAT TGC WGC TGG            |
| 12                         | 5079-5106F     | GTGCTGCAYTRATGATWGCAGATRTMAG         | 6327-6353R     | CRA ATG TRS TGA ACT GAT CAA CAA CAC   |
| 13                         | 5603-5630F     | CTWGCACATGCWTTTTCATACWATMAGRG        | 6503-6535R     | TAGTAGTAGTATGCTCCGGAAAAATGAAAAATRAA   |
| 14                         | 5951-5978F     | GTY GAT GAR GAT GAA GAG RTT GATGATG  |                |                                       |

Reference sequences included: S-segment (JQ026204, GU904032, GU904031, GU904030, GU904029, GU904028, GU904027, GQ205407, GQ205408, GQ205406, GQ205405, GQ205404, GQ205403, GQ205402, GQ205401, KT885043, KC676608), M-segment (AY961616, AY168578, AY168577, NC\_005234, DL139689, DI163052, AJ410616, AJ009774, HV984406, L33685, MH251335, KT885042, JQ026205, JF920149, GU904038, GU904037, GU904036, GU904035, GU904034, GU904033, GQ205413, GQ205412, GQ205411, GQ205410, GQ205409, EU188453, EU188450), L-segment (NC\_005235, JQ026206, MH251336, AJ410617, KT885041, JF920148, GU904044, GU904045, GU904043, GU904042, GU904041, GU904040, EU188450)
