# Supplementary material for: Prevalence of Hantaviruses Harbored by Murid Rodents in Northwestern Ukraine and Discovery of a Novel Puumala Virus Strain
Source: MDPI journal article supplement (doi:10.3390/v13081640), 2021-08-18
Supplement: s1 [file s1]

Table S1. Trap Coordinates

| ID | Trap numb | Latitude | Longitude | Elevation |
|----|-----------|----------|-----------|-----------|
| 1  | A0001     | 51.20326 | 24.08906  | 155.9159  |
| 2  | A0002     | 51.20321 | 24.08916  | 154.143   |
| 3  | A0003     | 51.20312 | 24.08931  | 155.244   |
| 4  | A0004     | 51.20301 | 24.08946  | 155.8412  |
| 5  | A0005     | 51.20293 | 24.0896   | 154.4603  |
| 6  | A0006     | 51.2029  | 24.0897   | 154.2177  |
| 7  | A0007     | 51.20284 | 24.08979  | 155.7012  |
| 8  | A0008     | 51.2028  | 24.08993  | 157.0822  |
| 9  | A0009     | 51.20274 | 24.09006  | 156.9516  |
| 10 | A0010     | 51.20267 | 24.09018  | 155.4586  |
| 11 | A0011     | 51.20252 | 24.09029  | 156.4757  |
| 12 | A0012     | 51.20246 | 24.09035  | 156.681   |
| 13 | A0013     | 51.20239 | 24.09045  | 155.8599  |
| 14 | A0014     | 51.20229 | 24.09056  | 157.4274  |
| 15 | A0015     | 51.20222 | 24.09069  | 156.5877  |
| 16 | A0016     | 51.20217 | 24.09081  | 157.6794  |
| 17 | A0017     | 51.20214 | 24.09089  | 158.0899  |
| 18 | A0018     | 51.20207 | 24.09105  | 158.3885  |
| 19 | A0019     | 51.20201 | 24.0912   | 156.9516  |
| 20 | A0020     | 51.20198 | 24.09125  | 156.9516  |
| 21 | A0021     | 51.2019  | 24.09135  | 156.9516  |
| 22 | A0022     | 51.20183 | 24.09147  | 156.9516  |
| 23 | A0023     | 51.20173 | 24.09161  | 156.9516  |
| 24 | A0024     | 51.20166 | 24.09175  | 156.9516  |
| 25 | A0025     | 51.20157 | 24.09183  | 156.9516  |
| 26 | A0026     | 51.20147 | 24.09194  | 158.6871  |
| 27 | A0027     | 51.20139 | 24.09205  | 158.827   |
| 28 | A0028     | 51.20132 | 24.09211  | 158.5751  |
| 29 | A0029     | 51.20127 | 24.09217  | 158.4072  |
| 30 | A0030     | 51.20118 | 24.09231  | 158.3232  |
| 31 | A0031     | 51.20109 | 24.09243  | 157.7913  |
| 32 | A0032     | 51.20097 | 24.09243  | 157.4274  |
| 33 | A0033     | 51.20091 | 24.09243  | 157.698   |
| 34 | A0034     | 51.20082 | 24.0925   | 157.67    |
| 35 | A0035     | 51.2007  | 24.09252  | 157.4181  |
| 36 | A0036     | 51.20063 | 24.09252  | 157.6887  |
| 37 | A0037     | 51.20053 | 24.09253  | 157.1662  |
| 38 | A0038     | 51.20041 | 24.09255  | 154.6282  |
| 39 | A0039     | 51.20029 | 24.09259  | 155.9998  |
| 40 | A0040     | 51.20018 | 24.09267  | 156.7743  |
| 41 | A0041     | 51.2001  | 24.09274  | 154.115   |
| 42 | A0042     | 51.19999 | 24.09276  | 155.8505  |
| 43 | A0043     | 51.19991 | 24.09279  | 156.0185  |
| 44 | A0044     | 51.19979 | 24.09283  | 154.7682  |
| 45 | A0045     | 51.19968 | 24.09285  | 155.3187  |

|          |          |          |          |
|----------|----------|----------|----------|
| 46 A0046 | 51.19954 | 24.09282 | 153.1913 |
| 47 A0047 | 51.19945 | 24.09281 | 154.283  |
| 48 A0048 | 51.19936 | 24.09277 | 154.6469 |
| 49 A0049 | 51.19927 | 24.09271 | 155.2161 |
| 50 A0050 | 51.19916 | 24.09261 | 152.9394 |
| 51 B0001 | 51.20296 | 24.08916 | 158.5098 |
| 52 B0002 | 51.20294 | 24.08908 | 158.5098 |
| 53 B0003 | 51.2029  | 24.08899 | 158.5098 |
| 54 B0004 | 51.20283 | 24.08891 | 158.5098 |
| 55 B0005 | 51.20275 | 24.08882 | 158.5098 |
| 56 B0006 | 51.20269 | 24.08872 | 158.5098 |
| 57 B0007 | 51.20261 | 24.08861 | 158.5098 |
| 58 B0008 | 51.20247 | 24.08851 | 158.5098 |
| 59 B0009 | 51.20243 | 24.08844 | 158.5098 |
| 60 B0010 | 51.20241 | 24.08839 | 159.1723 |
| 61 B0011 | 51.20228 | 24.08825 | 160.1613 |
| 62 B0012 | 51.20214 | 24.088   | 161.225  |
| 63 B0013 | 51.20209 | 24.08792 | 161.225  |
| 64 B0014 | 51.20198 | 24.08776 | 161.225  |
| 65 B0015 | 51.20189 | 24.0877  | 161.225  |
| 66 B0016 | 51.20183 | 24.08762 | 161.225  |
| 67 B0017 | 51.20174 | 24.08752 | 161.225  |
| 68 B0018 | 51.20165 | 24.08737 | 161.225  |
| 69 B0019 | 51.2016  | 24.08724 | 161.2157 |
| 70 B0020 | 51.20153 | 24.08716 | 161.2157 |
| 71 B0021 | 51.20143 | 24.0871  | 155.8599 |
| 72 B0022 | 51.20137 | 24.08701 | 156.9236 |
| 73 B0023 | 51.20128 | 24.08707 | 158.1272 |
| 74 B0024 | 51.20119 | 24.08712 | 158.4725 |
| 75 B0025 | 51.20113 | 24.08704 | 158.4725 |
| 76 B0026 | 51.20106 | 24.08697 | 158.4725 |
| 77 B0027 | 51.20101 | 24.08694 | 158.4725 |
| 78 B0028 | 51.20096 | 24.08688 | 158.4725 |
| 79 B0029 | 51.20091 | 24.08681 | 158.4725 |
| 80 B0030 | 51.20087 | 24.08678 | 158.4725 |
| 81 B0031 | 51.2008  | 24.08672 | 158.4725 |
| 82 B0032 | 51.20069 | 24.08666 | 154.1803 |
| 83 B0033 | 51.20057 | 24.0866  | 156.3451 |
| 84 B0034 | 51.20051 | 24.08655 | 154.6469 |
| 85 B0035 | 51.20044 | 24.08649 | 153.6485 |
| 86 B0036 | 51.20037 | 24.08641 | 154.8615 |
| 87 B0037 | 51.20033 | 24.08636 | 154.4043 |
| 88 B0038 | 51.20027 | 24.08626 | 155.1974 |
| 89 B0039 | 51.20022 | 24.0862  | 154.8522 |
| 90 B0040 | 51.20012 | 24.08619 | 154.143  |
| 91 B0041 | 51.20006 | 24.08621 | 155.2534 |
| 92 B0042 | 51.19997 | 24.08624 | 154.4603 |

|           |          |          |          |
|-----------|----------|----------|----------|
| 93 B0043  | 51.1999  | 24.08623 | 154.4976 |
| 94 B0044  | 51.1998  | 24.08625 | 154.7589 |
| 95 B0045  | 51.19972 | 24.08629 | 156.1864 |
| 96 B0046  | 51.1997  | 24.08627 | 156.0838 |
| 97 B0047  | 51.19964 | 24.08625 | 155.5706 |
| 98 B0048  | 51.19953 | 24.08628 | 155.7106 |
| 99 B0049  | 51.19942 | 24.08632 | 202.9052 |
| 100 B0050 | 51.19936 | 24.08631 | 204.6687 |
| 101 C0001 | 51.20509 | 24.08601 | 199.6675 |
| 102 C0002 | 51.20516 | 24.08603 | 199.6675 |
| 103 C0003 | 51.2052  | 24.08607 | 199.6675 |
| 104 C0004 | 51.20526 | 24.08613 | 199.6675 |
| 105 C0005 | 51.20533 | 24.08612 | 199.6675 |
| 106 C0006 | 51.20535 | 24.08616 | 199.6675 |
| 107 C0007 | 51.20541 | 24.08622 | 199.6675 |
| 108 C0008 | 51.20547 | 24.08632 | 199.6675 |
| 109 C0009 | 51.20551 | 24.08637 | 199.145  |
| 110 C0010 | 51.20555 | 24.0864  | 199.2289 |
| 111 C0011 | 51.20562 | 24.08644 | 199.4529 |
| 112 C0012 | 51.20564 | 24.08651 | 199.0423 |
| 113 C0013 | 51.20569 | 24.08645 | 198.9863 |
| 114 C0014 | 51.20573 | 24.08638 | 198.6877 |
| 115 C0015 | 51.20578 | 24.0863  | 198.5758 |
| 116 C0016 | 51.20579 | 24.08624 | 198.5758 |
| 117 C0017 | 51.20585 | 24.08618 | 198.5758 |
| 118 C0018 | 51.20583 | 24.08613 | 198.5758 |
| 119 C0019 | 51.20585 | 24.08602 | 198.5758 |
| 120 C0020 | 51.20585 | 24.08592 | 198.5758 |
| 121 C0021 | 51.20584 | 24.08587 | 198.5758 |
| 122 C0022 | 51.20582 | 24.08579 | 198.5758 |
| 123 C0023 | 51.20583 | 24.08573 | 198.5758 |
| 124 C0024 | 51.20584 | 24.08567 | 198.5758 |
| 125 C0025 | 51.20582 | 24.08555 | 198.5758 |
| 126 C0026 | 51.20584 | 24.08542 | 198.5758 |
| 127 C0027 | 51.20586 | 24.08532 | 198.5758 |
| 128 C0028 | 51.2059  | 24.0852  | 198.5758 |
| 129 C0029 | 51.20592 | 24.08514 | 198.5758 |
| 130 C0030 | 51.20594 | 24.08511 | 198.5758 |
| 131 C0031 | 51.20599 | 24.08508 | 198.5758 |
| 132 C0032 | 51.20606 | 24.08508 | 198.5758 |
| 133 C0033 | 51.20609 | 24.08513 | 198.5758 |
| 134 C0034 | 51.20612 | 24.08516 | 198.5758 |
| 135 C0035 | 51.20614 | 24.0852  | 198.5758 |
| 136 C0036 | 51.20619 | 24.08523 | 198.5758 |
| 137 C0037 | 51.20624 | 24.08518 | 198.5758 |
| 138 C0038 | 51.20624 | 24.08509 | 198.5758 |
| 139 C0039 | 51.20626 | 24.08503 | 197.8387 |

|           |          |          |          |
|-----------|----------|----------|----------|
| 140 C0040 | 51.20627 | 24.08495 | 198.1839 |
| 141 C0041 | 51.20631 | 24.08486 | 198.5758 |
| 142 C0042 | 51.20634 | 24.08473 | 198.3145 |
| 143 C0043 | 51.20631 | 24.08465 | 197.68   |
| 144 C0044 | 51.20629 | 24.08458 | 197.68   |
| 145 C0045 | 51.20628 | 24.08453 | 197.68   |
| 146 C0046 | 51.20628 | 24.08443 | 197.68   |
| 147 C0047 | 51.20628 | 24.08438 | 197.68   |
| 148 C0048 | 51.2063  | 24.08429 | 200.1153 |
| 149 C0049 | 51.20632 | 24.08414 | 198.2959 |
| 150 C0050 | 51.2063  | 24.08405 | 201.319  |
| 151 D0001 | 51.20464 | 24.08685 | 195.0954 |
| 152 D0002 | 51.20464 | 24.08685 | 184.9609 |
| 153 D0003 | 51.20465 | 24.08661 | 195.8512 |
| 154 D0004 | 51.20462 | 24.08652 | 195.8512 |
| 155 D0005 | 51.20462 | 24.08642 | 195.8512 |
| 156 D0006 | 51.20464 | 24.08634 | 195.8512 |
| 157 D0007 | 51.20463 | 24.08622 | 195.8512 |
| 158 D0008 | 51.20463 | 24.08611 | 195.8512 |
| 159 D0009 | 51.20464 | 24.08603 | 195.8512 |
| 160 D0010 | 51.20464 | 24.08589 | 195.8512 |
| 161 D0011 | 51.20464 | 24.08583 | 195.8512 |
| 162 D0012 | 51.2046  | 24.08575 | 195.8512 |
| 163 D0013 | 51.20457 | 24.08562 | 195.8512 |
| 164 D0014 | 51.20455 | 24.08552 | 195.8512 |
| 165 D0015 | 51.20455 | 24.08536 | 195.8512 |
| 166 D0016 | 51.20456 | 24.08525 | 195.8512 |
| 167 D0017 | 51.20454 | 24.08514 | 195.8512 |
| 168 D0018 | 51.20452 | 24.08499 | 195.8512 |
| 169 D0019 | 51.20451 | 24.08488 | 195.8512 |
| 170 D0020 | 51.20452 | 24.08476 | 196.2991 |
| 171 D0021 | 51.2045  | 24.08465 | 196.0192 |
| 172 D0022 | 51.2045  | 24.08454 | 195.8979 |
| 173 D0023 | 51.2045  | 24.08437 | 191.951  |
| 174 D0024 | 51.20449 | 24.08421 | 191.951  |
| 175 D0025 | 51.20449 | 24.08412 | 191.951  |
| 176 D0026 | 51.20449 | 24.08394 | 191.951  |
| 177 D0027 | 51.20447 | 24.08375 | 191.923  |
| 178 D0028 | 51.20447 | 24.08365 | 194.1997 |
| 179 D0029 | 51.20445 | 24.08352 | 196.2898 |
| 180 D0030 | 51.20445 | 24.08338 | 196.4857 |
| 181 D0031 | 51.20441 | 24.08322 | 195.0768 |
| 182 D0032 | 51.20441 | 24.0831  | 196.7283 |
| 183 D0033 | 51.20444 | 24.08296 | 196.7563 |
| 184 D0034 | 51.20441 | 24.08284 | 196.8869 |
| 185 D0035 | 51.20439 | 24.08272 | 196.5697 |
| 186 D0036 | 51.20438 | 24.08259 | 196.6817 |

|           |          |          |          |
|-----------|----------|----------|----------|
| 187 D0037 | 51.20438 | 24.08252 | 196.4297 |
| 188 D0038 | 51.20441 | 24.08245 | 194.6569 |
| 189 D0039 | 51.20443 | 24.08237 | 196.9616 |
| 190 D0040 | 51.20446 | 24.08228 | 196.8589 |
| 191 D0041 | 51.20447 | 24.08221 | 197.6894 |
| 192 D0042 | 51.20446 | 24.08211 | 197.5867 |
| 193 D0043 | 51.20445 | 24.08201 | 197.5681 |
| 194 D0044 | 51.20441 | 24.08183 | 197.6147 |
| 195 D0045 | 51.20441 | 24.08176 | 198.1466 |
| 196 D0046 | 51.20441 | 24.08162 | 198.1746 |
| 197 D0047 | 51.2044  | 24.08151 | 198.3052 |
| 198 D0048 | 51.2044  | 24.08138 | 198.3985 |
| 199 D0049 | 51.2044  | 24.0813  | 197.5494 |
| 200 D0050 | 51.20436 | 24.08123 | 198.7437 |
| 201 E0001 | 51.26836 | 23.99378 | 183.7307 |
| 202 E0002 | 51.2684  | 23.99385 | 181.7805 |
| 203 E0003 | 51.26849 | 23.99401 | 181.6312 |
| 204 E0004 | 51.26862 | 23.99421 | 182.1351 |
| 205 E0005 | 51.26872 | 23.99413 | 182.3124 |
| 206 E0006 | 51.2688  | 23.99402 | 182.5083 |
| 207 E0007 | 51.26893 | 23.9939  | 182.2097 |
| 208 E0008 | 51.269   | 23.99383 | 182.2471 |
| 209 E0009 | 51.26904 | 23.99394 | 181.0901 |
| 210 E0010 | 51.26912 | 23.99401 | 181.454  |
| 211 E0011 | 51.2691  | 23.99412 | 180.9594 |
| 212 E0012 | 51.2691  | 23.99417 | 181.2393 |
| 213 E0013 | 51.26914 | 23.99436 | 180.9781 |
| 214 E0014 | 51.26917 | 23.99451 | 180.7075 |
| 215 E0015 | 51.26916 | 23.99462 | 181.1927 |
| 216 E0016 | 51.26905 | 23.99467 | 179.5598 |
| 217 E0017 | 51.26895 | 23.99473 | 181.1087 |
| 218 E0018 | 51.26885 | 23.99473 | 180.5769 |
| 219 E0019 | 51.26873 | 23.9947  | 180.8288 |
| 220 E0020 | 51.26862 | 23.99474 | 180.7448 |
| 221 E0021 | 51.26853 | 23.99476 | 180.2596 |
| 222 E0022 | 51.26845 | 23.99483 | 181.3047 |
| 223 E0023 | 51.26835 | 23.99482 | 180.9314 |
| 224 E0024 | 51.26826 | 23.99488 | 181.5006 |
| 225 E0025 | 51.26821 | 23.99494 | 182.2191 |
| 226 F0001 | 51.26815 | 23.99247 | 182.555  |
| 227 F0002 | 51.26815 | 23.99236 | 181.1834 |
| 228 F0003 | 51.26813 | 23.9923  | 179.8304 |
| 229 F0004 | 51.26816 | 23.99223 | 181.1181 |
| 230 F0005 | 51.26819 | 23.99214 | 181.23   |
| 231 F0006 | 51.26822 | 23.99203 | 180.8288 |
| 232 F0007 | 51.26822 | 23.99183 | 180.6049 |
| 233 F0008 | 51.26823 | 23.99169 | 181.4446 |

|           |          |          |          |
|-----------|----------|----------|----------|
| 234 F0009 | 51.26824 | 23.99151 | 181.314  |
| 235 F0010 | 51.26826 | 23.99142 | 182.0885 |
| 236 F0011 | 51.2683  | 23.9913  | 181.5099 |
| 237 F0012 | 51.26834 | 23.9912  | 181.2207 |
| 238 F0013 | 51.26836 | 23.99107 | 181.0154 |
| 239 F0014 | 51.26837 | 23.99097 | 181.5566 |
| 240 F0015 | 51.2684  | 23.99086 | 181.5659 |
| 241 F0016 | 51.26844 | 23.99072 | 181.5379 |
| 242 F0017 | 51.26845 | 23.99059 | 180.8568 |
| 243 F0018 | 51.26847 | 23.99048 | 179.1026 |
| 244 F0019 | 51.26847 | 23.99037 | 181.7619 |
| 245 F0020 | 51.26849 | 23.99026 | 179.6438 |
| 246 F0021 | 51.26849 | 23.99014 | 179.8118 |
| 247 F0022 | 51.26852 | 23.99001 | 180.2503 |
| 248 F0023 | 51.26855 | 23.98987 | 180.0077 |
| 249 F0024 | 51.26855 | 23.98969 | 181.7712 |
| 250 F0025 | 51.26857 | 23.98958 | 180.8195 |
| 251 G0001 | 51.26678 | 23.994   | 180.0077 |
| 252 G0002 | 51.26679 | 23.99416 | 180.0077 |
| 253 G0003 | 51.26684 | 23.99435 | 180.0077 |
| 254 G0004 | 51.26689 | 23.99454 | 180.0077 |
| 255 G0005 | 51.26694 | 23.99475 | 180.0077 |
| 256 G0006 | 51.26689 | 23.99497 | 180.0077 |
| 257 G0007 | 51.26686 | 23.99513 | 180.0077 |
| 258 G0008 | 51.26687 | 23.99523 | 180.0077 |
| 259 G0009 | 51.26683 | 23.99543 | 182.3217 |
| 260 G0010 | 51.2668  | 23.99554 | 182.1724 |
| 261 G0011 | 51.26677 | 23.99571 | 182.583  |
| 262 G0012 | 51.26671 | 23.99592 | 182.8536 |
| 263 G0013 | 51.26666 | 23.99606 | 183.2921 |
| 264 G0014 | 51.26661 | 23.99626 | 183.3761 |
| 265 G0015 | 51.26661 | 23.9964  | 183.7307 |
| 266 G0016 | 51.26657 | 23.9966  | 183.8986 |
| 267 G0017 | 51.26651 | 23.99698 | 184.1879 |
| 268 G0018 | 51.26647 | 23.99723 | 184.1225 |
| 269 G0019 | 51.26641 | 23.99741 | 184.1319 |
| 270 G0020 | 51.26636 | 23.99763 | 184.7664 |
| 271 G0021 | 51.26634 | 23.99775 | 185.1489 |
| 272 G0022 | 51.26629 | 23.99788 | 185.4008 |
| 273 G0023 | 51.26625 | 23.99804 | 185.1302 |
| 274 G0024 | 51.26622 | 23.99824 | 185.0276 |
| 275 G0025 | 51.2665  | 23.99673 | 185.0276 |
| 276 H0001 | 51.26677 | 23.9926  | 180.8568 |
| 277 H0002 | 51.26674 | 23.99247 | 180.8568 |
| 278 H0003 | 51.26672 | 23.99233 | 180.8568 |
| 279 H0004 | 51.26673 | 23.99219 | 180.8568 |
| 280 H0005 | 51.26672 | 23.99206 | 180.8568 |

|           |          |          |          |
|-----------|----------|----------|----------|
| 281 H0006 | 51.26671 | 23.99193 | 180.8568 |
| 282 H0007 | 51.26669 | 23.9918  | 180.8568 |
| 283 H0008 | 51.26667 | 23.99166 | 180.8568 |
| 284 H0009 | 51.26665 | 23.99152 | 180.8568 |
| 285 H0010 | 51.26661 | 23.99138 | 180.8568 |
| 286 H0011 | 51.2666  | 23.99127 | 175.6689 |
| 287 H0012 | 51.26659 | 23.99114 | 180.8848 |
| 288 H0013 | 51.26656 | 23.99099 | 179.9797 |
| 289 H0014 | 51.26655 | 23.99085 | 180.6795 |
| 290 H0015 | 51.26654 | 23.99074 | 180.1383 |
| 291 H0016 | 51.26651 | 23.99063 | 179.5318 |
| 292 H0017 | 51.26651 | 23.9905  | 179.1679 |
| 293 H0018 | 51.2665  | 23.99034 | 179.3639 |
| 294 H0019 | 51.26648 | 23.9902  | 178.7574 |
| 295 H0020 | 51.26643 | 23.9901  | 179.0466 |
| 296 H0021 | 51.26637 | 23.99002 | 179.1959 |
| 297 H0022 | 51.26631 | 23.98994 | 179.3546 |
| 298 H0023 | 51.26624 | 23.98983 | 177.843  |
| 299 H0024 | 51.26619 | 23.98975 | 177.8243 |
| 300 H0025 | 51.26614 | 23.98966 | 178.7947 |
| 301 I0001 | 51.26771 | 23.99239 | 218.4222 |
| 302 I0002 | 51.26766 | 23.99222 | 220.8761 |
| 303 I0003 | 51.26763 | 23.99215 | 220.8761 |
| 304 I0004 | 51.2676  | 23.99204 | 220.8761 |
| 305 I0005 | 51.26757 | 23.99196 | 220.8761 |
| 306 I0006 | 51.26757 | 23.99183 | 220.8761 |
| 307 I0007 | 51.26751 | 23.99175 | 220.8761 |
| 308 I0008 | 51.26743 | 23.99173 | 220.8761 |
| 309 I0009 | 51.26735 | 23.99171 | 221.2214 |
| 310 I0010 | 51.26729 | 23.99171 | 220.4189 |
| 311 I0011 | 51.26721 | 23.99171 | 222.0891 |
| 312 I0012 | 51.26716 | 23.9916  | 220.2043 |
| 313 I0013 | 51.26716 | 23.99142 | 219.3646 |
| 314 I0014 | 51.26717 | 23.9913  | 220.4563 |
| 315 I0015 | 51.2672  | 23.99117 | 220.4563 |
| 316 I0016 | 51.2672  | 23.99105 | 220.4563 |
| 317 I0017 | 51.2672  | 23.99094 | 220.4563 |
| 318 I0018 | 51.26716 | 23.99089 | 220.4563 |
| 319 I0019 | 51.26708 | 23.99091 | 220.4563 |
| 320 I0020 | 51.26701 | 23.99092 | 218.8887 |
| 321 I0021 | 51.26694 | 23.99088 | 220.7268 |
| 322 I0022 | 51.26685 | 23.99081 | 220.2603 |
| 323 I0023 | 51.2669  | 23.99063 | 219.1406 |
| 324 I0024 | 51.26694 | 23.99053 | 219.3366 |
| 325 I0025 | 51.267   | 23.99051 | 220.0644 |
