# Supplementary material for: Prevalence of Hantaviruses Harbored by Murid Rodents in Northwestern Ukraine and Discovery of a Novel Puumala Virus Strain
Source: MDPI journal article supplement (doi:10.3390/v13081640), 2021-08-18
Supplement: s1 [file s1]

Table S3. Small mammal database

| 1_Specimen | 2_Ab_or_f | 3_Date     | 4_Trap_Ltr | 5_Trap_Nr | 6_Status | 7_Weight | 8_Genus  | 9_Species    | 10_Male_c | 11_Age   | 12_Blood | 13_Heart | 14_Lung | 15_Kidney | 16_Muscle | 17_Total_f | 18_Tail_L | 19_Hind_fi | 20_Ear_ler | 21_Time_c | 22_IFA_1:1 | 23_IFA_1:1 | 24_IFA_SC | 25_RTPCR   | 26_Comments                 |
|------------|-----------|------------|------------|-----------|----------|----------|----------|--------------|-----------|----------|----------|----------|---------|-----------|-----------|------------|-----------|------------|------------|-----------|------------|------------|-----------|------------|-----------------------------|
| 248        | 0         | 26/09/2019 | B          | 12        | Dead     | 16.5     | Apodemus | flavicolus   | Male      | juvenile | No       | Yes      | Yes     | Yes       | Yes       | 754        | 750       | 221        | 168        | Am        | NEGATIVE   | NOT TESTE  | 0         | Not Tested |                             |
| 312        | 0         | 29/09/2019 | C          | 36        | Dead     | 7.6      | Sorex    | minutus      | Female    | adult    | No       | Yes      | Yes     | Yes       | Yes       | 679        | 357       | 121        | 52         | Am        | NEGATIVE   | NOT TESTE  | 0         | Not Tested |                             |
| 523        | 1         | 2/10/2019  | F          | 17        | Dead     | 23       | Apodemus | flavicolus   | Male      | adult    | No       | Yes      | Yes     | Yes       | Yes       | 936        | 1010      | 260        | 194        | Am        | POSITIVE   | POSITIVE   | 64        | NEGATIVE   |                             |
| 522        | 0         | 2/10/2019  | F          | 6         | Dead     | 7.8      | Sorex    | minutus      | Male      | adult    | No       | Yes      | Yes     | Yes       | Yes       | 690        | 403       | 135        | 74         | Am        | NEGATIVE   | NOT TESTE  | 0         | Not Tested |                             |
| 521        | 0         | 2/10/2019  | F          | 5         | Dead     | 11.5     | Myodes   | glareolus    | Male      | juvenile | No       | Yes      | Yes     | Yes       | Yes       | 729        | 357       | 174        | 144        | Am        | NEGATIVE   | NOT TESTE  | 0         | Not Tested |                             |
| 520        | 0         | 2/10/2019  | F          | 7         | Dead     | 16.1     | Myodes   | glareolus    | Male      | adult    | No       | Yes      | Yes     | Yes       | Yes       | 786        | 405       | 160        | 130        | Am        | NEGATIVE   | NOT TESTE  | 0         | Not Tested |                             |
| 519        | 0         | 2/10/2019  | F          | 13        | Dead     | 15.1     | Myodes   | glareolus    | Male      | adult    | No       | Yes      | Yes     | Yes       | Yes       | 847        | 360       | 184        | 150        | Am        | NEGATIVE   | NOT TESTE  | 0         | Not Tested |                             |
| 518        | 0         | 2/10/2019  | F          | 13        | Dead     | 13.7     | Myodes   | glareolus    | Male      | adult    | No       | Yes      | Yes     | Yes       | Yes       | 744        | 414       | 180        | 142        | Am        | NEGATIVE   | NOT TESTE  | 0         | Not Tested |                             |
| 517        | 0         | 2/10/2019  | F          | 21        | Dead     | 16.3     | Myodes   | glareolus    | Male      | adult    | No       | Yes      | Yes     | Yes       | Yes       | 800        | 391       | 173        | 105        | Am        | NEGATIVE   | NOT TESTE  | 0         | Not Tested |                             |
| 516        | 0         | 2/10/2019  | I          | 10        | Dead     | 17.6     | Microtus | arvalis      | Female    | adult    | No       | Yes      | Yes     | Yes       | Yes       | 900        | 446       | 117        | 142        | Am        | NEGATIVE   | NOT TESTE  | 0         | Not Tested |                             |
| 515        | 0         | 2/10/2019  | G          | 8         | Dead     | 7.3      | Sorex    | minutus      | Male      | adult    | No       | Yes      | Yes     | Yes       | Yes       | 635        | 405       | 140        | 84         | Am        | NEGATIVE   | NOT TESTE  | 0         | Not Tested |                             |
| 514        | 0         | 2/10/2019  | E          | 17        | Dead     | 7.2      | Sorex    | minutus      | Male      | adult    | No       | Yes      | Yes     | Yes       | Yes       | 650        | 374       | 142        | 63         | Am        | NEGATIVE   | NOT TESTE  | 0         | Not Tested |                             |
| 513        | 0         | 2/10/2019  | G          | 4         | Dead     | 14.1     | Apodemus | agrarus      | Female    | adult    | No       | Yes      | Yes     | Yes       | Yes       | 767        | 651       | 203        | 110        | Am        | NEGATIVE   | NOT TESTE  | 0         | Not Tested |                             |
| 512        | 0         | 2/10/2019  | G          | 5         | Dead     | 16.9     | Apodemus | agrarus      | Female    | adult    | No       | Yes      | Yes     | Yes       | Yes       | 885        | 724       | 207        | 140        | Am        | NEGATIVE   | NOT TESTE  | 0         | Not Tested | Fleas                       |
| 511        | 0         | 2/10/2019  | G          | 21        | Alive    | 13.2     | Microtus | arvalis      | Male      | adult    | Yes      | Yes      | Yes     | Yes       | Yes       | 834        | 311       | 179        | 118        | Am        | NEGATIVE   | NOT TESTE  | 0         | Not Tested |                             |
| 510        | 0         | 2/10/2019  | G          | 11        | Alive    | 13.6     | Microtus | arvalis      | Male      | adult    | Yes      | Yes      | Yes     | Yes       | Yes       | 857        | 310       | 160        | 132        | Am        | NEGATIVE   | NOT TESTE  | 0         | Not Tested |                             |
| 509        | 0         | 2/10/2019  | G          | 19        | Alive    | 24.7     | Apodemus | flavicolus   | Male      | adult    | Yes      | Yes      | Yes     | Yes       | Yes       | 1019       | 1010      | 265        | 192        | Am        | NEGATIVE   | NOT TESTE  | 0         | Not Tested |                             |
| 508        | 0         | 2/10/2019  | E          | 8         | Dead     | 8.3      | Sorex    | minutus      | Female    | adult    | No       | Yes      | Yes     | Yes       | Yes       | 603        | 420       | 134        | 75         | Am        | NEGATIVE   | NOT TESTED | 0         | Not Tested |                             |
| 507        | 0         | 2/10/2019  | I          | 9         | Alive    | 23.3     | Apodemus | agrarus      | Male      | adult    | Yes      | Yes      | Yes     | Yes       | Yes       | 1004       | 1000      | 250        | 170        | Am        | NEGATIVE   | NOT TESTE  | 0         | Not Tested |                             |
| 506        | 0         | 2/10/2019  | I          | 8         | Dead     | 14.2     | Myodes   | glareolus    | Male      | adult    | Yes      | Yes      | Yes     | Yes       | Yes       | 772        | 382       | 183        | 117        | Am        | NEGATIVE   | NOT TESTE  | 0         | Not Tested | Small amount of blood taken |
| 505        | 0         | 2/10/2019  | I          | 18        | Alive    | 30.8     | Apodemus | flavicolus   | Female    | adult    | Yes      | Yes      | Yes     | Yes       | Yes       | 1115       | 1077      | 262        | 212        | Am        | NEGATIVE   | NOT TESTE  | 0         | Not Tested | Lactating                   |
| 504        | 0         | 2/10/2019  | E          | 9         | Alive    | 15.1     | Myodes   | glareolus    | Male      | adult    | Yes      | Yes      | Yes     | Yes       | Yes       | 870        | 363       | 173        | 115        | Am        | NEGATIVE   | NOT TESTE  | 0         | Not Tested |                             |
| 503        | 0         | 2/10/2019  | E          | 20        | Alive    | 15.5     | Myodes   | glareolus    | Female    | adult    | Yes      | Yes      | Yes     | Yes       | Yes       | 866        | 445       | 162        | 137        | Am        | NEGATIVE   | NOT TESTE  | 0         | Not Tested |                             |
| 502        | 0         | 2/10/2019  | E          | 14        | Alive    | 15.2     | Myodes   | glareolus    | Female    | adult    | Yes      | Yes      | Yes     | Yes       | Yes       | 885        | 406       | 165        | 143        | Am        | NEGATIVE   | NOT TESTE  | 0         | Not Tested |                             |
| 501        | 0         | 2/10/2019  | I          | 11        | Alive    | 19.8     | Apodemus | flavicolus   | Male      | adult    | Yes      | Yes      | Yes     | Yes       | Yes       | 907        | 973       | 245        | 172        | Am        | NEGATIVE   | NOT TESTE  | 0         | Not Tested | Moribund, fleas             |
| 500        | 0         | 2/10/2019  | E          | 11        | Alive    | 15.6     | Myodes   | glareolus    | Female    | adult    | Yes      | Yes      | Yes     | Yes       | Yes       | 883        | 384       | 165        | 143        | Am        | NEGATIVE   | NOT TESTE  | 0         | Not Tested |                             |
| 499        | 0         | 2/10/2019  | E          | 13        | Alive    | 17.8     | Myodes   | glareolus    | Male      | adult    | Yes      | Yes      | Yes     | Yes       | Yes       | 874        | 346       | 186        | 122        | Am        | NEGATIVE   | NOT TESTE  | 0         | Not Tested |                             |
| 498        | 0         | 2/10/2019  | D          | 28        | Dead     | 13.9     | Apodemus | agrarus      | Male      | adult    | No       | Yes      | Yes     | Yes       | Yes       | 744        | 644       | 190        | 109        | Am        | NEGATIVE   | NOT TESTE  | 0         | Not Tested |                             |
| 497        | 0         | 2/10/2019  | C          | 18        | Dead     | 8.5      | Sorex    | minutus      | Male      | adult    | No       | Yes      | Yes     | Yes       | Yes       | 596        | 408       | 142        | 55         | Am        | NEGATIVE   | NOT TESTE  | 0         | Not Tested |                             |
| 496        | 0         | 2/10/2019  | D          | 39        | Alive    | 14.6     | Myodes   | glareolus    | Female    | adult    | Yes      | Yes      | Yes     | Yes       | Yes       | 900        | 356       | 174        | 142        | Am        | NEGATIVE   | NOT TESTE  | 0         | Not Tested | Lactating                   |
| 495        | 1         | 2/10/2019  | C          | 11        | Dead     | 8        | Sorex    | minutus      | Male      | adult    | No       | Yes      | Yes     | Yes       | Yes       | 706        | 349       | 146        | 54         | Am        | POSITIVE   | POSITIVE   | 64        | Not Tested |                             |
| 494        | 0         | 2/10/2019  | C          | 26        | Dead     | 11.1     | Myodes   | glareolus    | Male      | juvenile | No       | Yes      | Yes     | Yes       | Yes       | 695        | 353       | 170        | 109        | Am        | NEGATIVE   | NOT TESTE  | 0         | Not Tested |                             |
| 493        | 0         | 2/10/2019  | D          | 8         | Alive    | 13.5     | Apodemus | agrarus      | Male      | adult    | Yes      | Yes      | Yes     | Yes       | Yes       | 803        | 662       | 193        | 100        | Am        | NEGATIVE   | NOT TESTE  | 0         | Not Tested | Moribund                    |
| 492        | 0         | 2/10/2019  | C          | 9         | Dead     | 12.6     | Myodes   | glareolus    | Female    | adult    | No       | Yes      | Yes     | Yes       | Yes       | 763        | 445       | 190        | 120        | Am        | NEGATIVE   | NOT TESTE  | 0         | Not Tested |                             |
| 491        | 0         | 2/10/2019  | C          | 37        | Dead     | 13.8     | Apodemus | agrarus      | Female    | adult    | No       | Yes      | Yes     | Yes       | Yes       | 798        | 662       | 190        | 108        | Am        | NEGATIVE   | NOT TESTE  | 0         | Not Tested |                             |
| 490        | 0         | 2/10/2019  | D          | 23        | Alive    | 20.5     | Apodemus | flavicolus   | Male      | juvenile | Yes      | Yes      | Yes     | Yes       | Yes       | 895        | 819       | 227        | 172        | Am        | NEGATIVE   | NOT TESTE  | 0         | Not Tested |                             |
| 489        | 0         | 2/10/2019  | D          | 31        | Alive    | 20.5     | Apodemus | flavicolus   | Male      | adult    | Yes      | Yes      | Yes     | Yes       | Yes       | 928        | 914       | 238        | 174        | Am        | NEGATIVE   | NOT TESTE  | 0         | Not Tested |                             |
| 488        | 0         | 2/10/2019  | D          | 40        | Alive    | 25.4     | Apodemus | flavicolus   | Female    | adult    | Yes      | Yes      | Yes     | Yes       | Yes       | 988        | 814       | 240        | 172        | Am        | NEGATIVE   | NOT TESTE  | 0         | Not Tested |                             |
| 487        | 0         | 2/10/2019  | C          | 23        | Alive    | 16.8     | Apodemus | flavicolus   | Male      | juvenile | Yes      | Yes      | Yes     | Yes       | Yes       | 878        | 874       | 247        | 158        | Am        | NEGATIVE   | NOT TESTE  | 0         | Not Tested |                             |
| 486        | 0         | 2/10/2019  | C          | 34        | Alive    | 14.2     | Myodes   | glareolus    | Male      | adult    | Yes      | Yes      | Yes     | Yes       | Yes       | 869        | 367       | 168        | 126        | Am        | POSITIVE   | NEGATIVE   | 0         | Not Tested |                             |
| 485        | 0         | 2/10/2019  | D          | 1         | Alive    | 11.6     | Microtus | subterraneus | Male      | adult    | Yes      | Yes      | Yes     | Yes       | Yes       | 790        | 226       | 138        | 86         | Am        | NEGATIVE   | NOT TESTE  | 0         | Not Tested | Microtus subterraneus       |
| 484        | 0         | 2/10/2019  | C          | 8         | Alive    | 18.9     | Apodemus | flavicolus   | Male      | adult    | Yes      | Yes      | Yes     | Yes       | Yes       | 914        | 753       | 226        | 154        | Am        | NEGATIVE   | NOT TESTE  | 0         | Not Tested |                             |
| 483        | 0         | 2/10/2019  | D          | 32        | Alive    | 13.8     | Myodes   | glareolus    | Female    | adult    | Yes      | Yes      | Yes     | Yes       | Yes       | 901        | 368       | 169        | 125        | Am        | NEGATIVE   | NOT TESTE  | 0         | Not Tested | Fleas                       |
| 482        | 0         | 2/10/2019  | D          | 47        | Alive    | 19       | Apodemus | agrarus      | Female    | adult    | Yes      | Yes      | Yes     | Yes       | Yes       | 915        | 626       | 200        | 110        | Am        | NEGATIVE   | NOT TESTE  | 0         | Not Tested |                             |
| 481        | 0         | 2/10/2019  | C          | 19        | Alive    | 6.1      | Sorex    | minutus      | Female    | adult    | Yes      | Yes      | Yes     | Yes       | Yes       | 621        | 355       | 111        | 59         | Am        | NEGATIVE   | NOT TESTE  | 0         | Not Tested |                             |
| 480        | 0         | 2/10/2019  | D          | 50        | Dead     | 8.2      | Myodes   | glareolus    | Male      | juvenile | Yes      | Yes      | Yes     | Yes       | Yes       | 663        | 349       | 164        | 108        | Am        | NEGATIVE   | NOT TESTE  | 0         | Not Tested |                             |
| 479        | 0         | 2/10/2019  | D          | 33        | Alive    | 7.5      | Sorex    | minutus      | Female    | adult    | Yes      | Yes      | Yes     | Yes       | Yes       | 704        | 335       | 114        | 58         | Am        | NEGATIVE   | NOT TESTE  | 0         | Not Tested |                             |
| 478        | 1         | 1/10/2019  | G          | 19        | Dead     | 14.2     | Apodemus | agrarus      | Female    | adult    | No       | Yes      | Yes     | Yes       | Yes       | 830        | 660       | 190        | 94         | Am        | POSITIVE   | POSITIVE   | 256       | NEGATIVE   |                             |
| 477        | 1         | 1/10/2019  | G          | 11        | Dead     | 13.5     | Apodemus | agrarus      | Male      | adult    | No       | Yes      | Yes     | Yes       | Yes       | 800        | 677       | 190        | 100        | Am        | POSITIVE   | POSITIVE   | 512       | POSITIVE   |                             |
| 476        | 0         | 1/10/2019  | F          | 3         | Dead     | 25.7     | Apodemus | flavicolus   | Male      | adult    | No       | Yes      | Yes     | Yes       | Yes       | 886        | 1006      | 250        | 176        | Am        | NEGATIVE   | NOT TESTE  | 0         | Not Tested |                             |
| 475        | 1         | 1/10/2019  | G          | 4         | Dead     | 16.9     | Apodemus | agrarus      | Male      | adult    | No       | Yes      | Yes     | Yes       | Yes       | 820        | 780       | 210        | 125        | Am        | POSITIVE   | POSITIVE   | 1024      | POSITIVE   |                             |
| 474        | 0         | 1/10/2019  | F          | 2         | Dead     | 10.5     | Myodes   | glareolus    | Male      | juvenile | No       | Yes      | Yes     | Yes       | Yes       | 657        | 274       | 150        | 100        | Am        | NEGATIVE   | NOT TESTE  | 0         | Not Tested |                             |
| 473        | 1         | 1/10/2019  | E          | 1         | Dead     | 29.6     | Apodemus | flavicolus   | Female    | adult    | No       | Yes      | Yes     | Yes       | Yes       | 897        | 960       | 256        | 164        | Am        | POSITIVE   | POSITIVE   | 1024      | POSITIVE   |                             |
| 472        | 0         | 1/10/2019  | E          | 11        | Dead     | 8.7      | Sorex    | minutus      | Female    | adult    | No       | Yes      | Yes     | Yes       | Yes       | 720        | 380       | 126        | 70         | Am        | NEGATIVE   | NOT TESTE  | 0         | Not Tested |                             |
| 471        | 0         | 1/10/2019  | I          | 10        | Dead     | 34.1     | Apodemus | flavicolus   | Male      | adult    | No       | Yes      | Yes     | Yes       | Yes       | 1038       | 945       | 253        | 174        | Am        | POSITIVE   | NEGATIVE   | 0         | Not Tested | Parasites                   |
| 470        | 0         | 1/10/2019  | E          | 20        | Dead     | 17.1     | Myodes   | glareolus    | Male      | adult    | No       | Yes      | Yes     | Yes       | Yes       | 792        | 430       | 167        | 129        | Am        | NEGATIVE   | NOT TESTE  | 0         | Not Tested |                             |
| 469        | 0         | 1/10/2019  | I          | 11        | Dead     | 15       | Myodes   | glareolus    | Female    | adult    | No       | Yes      | Yes     | Yes       | Yes       | 782        | 400       | 176        | 147        | Am        | NEGATIVE   | NOT TESTE  | 0         | Not Tested |                             |
| 468        | 0         | 1/10/2019  | E          | 24        | Dead     | 13.8     | Myodes   | glareolus    | Male      | adult    | No       | Yes      | Yes     | Yes       | Yes       | 792        | 390       | 175        | 130        | Am        | NEGATIVE   | NOT TESTE  | 0         | Not Tested |                             |
| 467        | 1         | 1/10/2019  | I          | 16        | Alive    | 25.3     | Apodemus | flavicolus   | Female    | adult    | Yes      | Yes      | Yes     | Yes       | Yes       | 994        | 1060      | 253        | 165        | Am        | POSITIVE   | POSITIVE   | 1024      | NEGATIVE   |                             |
| 466        | 0         | 1/10/2019  | I          | 15        | Dead     | 14.5     | Myodes   | glareolus    | Male      | adult    | No       | Yes      | Yes     | Yes       | Yes       | 772        | 404       | 165        | 134        | Am        | NEGATIVE   | NOT TESTE  | 0         | Not Tested |                             |
| 465        | 0         | 1/10/2019  | F          | 5         | Dead     | 21.4     | Myodes   | glareolus    | Male      | adult    | No       | Yes      | Yes     | Yes       | Yes       | 900        | 478       | 200        | 142        | Am        | NEGATIVE   | NOT TESTE  | 0         | Not Tested |                             |
| 464        | 0         | 1/10/2019  | E          | 17        | Dead     | 15.3     | Myodes   | glareolus    | Female    | adult    | No       | Yes      | Yes     | Yes       | Yes       | 854        | 461       | 163        | 127        | Am        | NEGATIVE   | NOT TESTE  | 0         | Not Tested |                             |
| 463        | 0         | 1/10/2019  | I          | 21        | Alive    | 14.6     | Myodes   | glareolus    | Male      | adult    | Yes      | Yes      | Yes     | Yes       | Yes       | 770        | 454       | 170        | 110        | Am        | NEGATIVE   | NOT TESTE  | 0         | Not Tested |                             |
| 462        | 0         | 1/10/2019  | E          | 12        | Alive    | 14.9     | Apodemus | agrarus      | Female    | adult    | Yes      | Yes      | Yes     | Yes       | Yes       | 836        | 674       | 206        | 100        | Am        | NEGATIVE   | NOT TESTE  | 0         | Not Tested |                             |
| 461        | 1         | 1/10/2019  | E          | 9         | Alive    | 22.2     | Apodemus | flavicolus   |           |          |          |          |         |           |           |            |           |            |            |           |            |            |           |            |                             |

|     |   |            |   |    |       |      |          |            |        |          |     |     |     |     |     |      |      |     |     |    |          |           |      |                                                                                        |
|-----|---|------------|---|----|-------|------|----------|------------|--------|----------|-----|-----|-----|-----|-----|------|------|-----|-----|----|----------|-----------|------|----------------------------------------------------------------------------------------|
| 438 | 0 | 1/10/2019  | D | 9  | Alive | 13.7 | Apodemus | agraricus  | Male   | adult    | Yes | Yes | Yes | Yes | Yes | 794  | 622  | 157 | 105 | Am | NEGATIVE | NOT TESTE | 0    | Not Tested                                                                             |
| 437 | 0 | 1/10/2019  | D | 19 | Dead  | 9.4  | Sorex    | minutus    | Male   | adult    | No  | Yes | Yes | Yes | Yes | 728  | 373  | 114 | 79  | Am | NEGATIVE | NOT TESTE | 0    | Not Tested                                                                             |
| 436 | 0 | 1/10/2019  | C | 18 | Dead  | 41.4 | Mustela  | nivalis    | Female | adult    | No  | Yes | Yes | Yes | Yes | 1520 | 395  | 204 | 73  | Am | NEGATIVE | NOT TESTE | 0    | Not Tested Weasel (Mustela nivalis)                                                    |
| 435 | 0 | 1/10/2019  | C | 37 | Alive | 16   | Apodemus | agraricus  | Female | adult    | Yes | Yes | Yes | Yes | Yes | 845  | 649  | 189 | 103 | Am | NEGATIVE | NOT TESTE | 0    | Not Tested                                                                             |
| 434 | 1 | 1/10/2019  | C | 43 | Dead  | 13.6 | Apodemus | agraricus  | Female | adult    | No  | Yes | Yes | Yes | Yes | 726  | 598  | 199 | 197 | Am | POSITIVE | POSITIVE  | 1024 | NEGATIVE                                                                               |
| 433 | 0 | 1/10/2019  | D | 48 | Dead  | 34.3 | Apodemus | flavicolus | Male   | adult    | No  | Yes | Yes | Yes | Yes | 884  | 1053 | 248 | 168 | Am | NEGATIVE | NEGATIVE  | 0    | Not Tested Fleas                                                                       |
| 432 | 0 | 1/10/2019  | D | 39 | Alive | 16.1 | Myodes   | glareolus  | Male   | adult    | Yes | Yes | Yes | Yes | Yes | 867  | 503  | 174 | 147 | Am | POSITIVE | NEGATIVE  | 0    | Not Tested Moribund                                                                    |
| 431 | 0 | 30/09/2019 | F | 10 | Dead  | 14.2 | Myodes   | glareolus  | Male   | adult    | No  | Yes | Yes | Yes | Yes | 765  | 395  | 164 | 105 | Am | NEGATIVE | NOT TESTE | 0    | Not Tested                                                                             |
| 430 | 0 | 30/09/2019 | F | 5  | Dead  | 14.4 | Myodes   | glareolus  | Male   | adult    | No  | Yes | Yes | Yes | Yes | 803  | 418  | 158 | 108 | Am | NEGATIVE | NOT TESTE | 0    | Not Tested                                                                             |
| 429 | 0 | 30/09/2019 | F | 2  | Dead  | 9.1  | Myodes   | glareolus  | Male   | juvenile | No  | Yes | Yes | Yes | Yes | 706  | 260  | 153 | 80  | Am | POSITIVE | NEGATIVE  | 0    | Not Tested                                                                             |
| 428 | 0 | 30/09/2019 | G | 25 | Dead  | 15.2 | Apodemus | agraricus  | Male   | adult    | No  | Yes | Yes | Yes | Yes | 865  | 707  | 195 | 108 | Am | NEGATIVE | NOT TESTE | 0    | Not Tested Tail infection                                                              |
| 427 | 0 | 30/09/2019 | G | 4  | Dead  | 13.7 | Apodemus | agraricus  | Female | adult    | No  | Yes | Yes | Yes | Yes | 762  | 671  | 129 | 112 | Am | POSITIVE | NEGATIVE  | 0    | Not Tested                                                                             |
| 426 | 0 | 30/09/2019 | I | 9  | Dead  | 16.9 | Myodes   | glareolus  | Male   | adult    | No  | Yes | Yes | Yes | Yes | 840  | 397  | 143 | 126 | Am | NEGATIVE | NOT TESTE | 0    | Not Tested                                                                             |
| 425 | 0 | 30/09/2019 | G | 19 | Dead  | 31.7 | Apodemus | flavicolus | Female | adult    | No  | Yes | Yes | Yes | Yes | 1051 | 0    | 238 | 214 | Am | NEGATIVE | NOT TESTE | 0    | Not Tested Broken tail                                                                 |
| 424 | 0 | 30/09/2019 | G | 24 | Dead  | 27.1 | Microtus | arvalis    | Male   | adult    | No  | Yes | Yes | Yes | Yes | 1068 | 340  | 150 | 148 | Am | NEGATIVE | NOT TESTE | 0    | Not Tested                                                                             |
| 423 | 1 | 30/09/2019 | G | 10 | Dead  | 12.8 | Apodemus | agraricus  | Female | adult    | No  | Yes | Yes | Yes | Yes | 764  | 636  | 170 | 93  | Am | NEGATIVE | NOT TESTE | 128  | NEGATIVE picked up during workshop 1-22 and screened- was not pos in prior two screens |
| 422 | 0 | 30/09/2019 | G | 7  | Dead  | 17.3 | Apodemus | agraricus  | Male   | adult    | No  | Yes | Yes | Yes | Yes | 858  | 712  | 175 | 120 | Am | NEGATIVE | NOT TESTE | 0    | Not Tested                                                                             |
| 421 | 0 | 30/09/2019 | G | 8  | Dead  | 15.3 | Apodemus | agraricus  | Male   | adult    | No  | Yes | Yes | Yes | Yes | 843  | 668  | 190 | 102 | Am | NEGATIVE | NEGATIVE  | 0    | Not Tested Mites; picked up in 1-22 workshop and screened by IFA using kidney blood    |
| 420 | 1 | 30/09/2019 | E | 20 | Dead  | 15.4 | Apodemus | agraricus  | Male   | adult    | No  | Yes | Yes | Yes | Yes | 828  | 680  | 200 | 106 | Am | POSITIVE | POSITIVE  | 128  | NEGATIVE Tail infection                                                                |
| 419 | 0 | 30/09/2019 | E | 11 | Dead  | 15.2 | Myodes   | glareolus  | Male   | adult    | No  | Yes | Yes | Yes | Yes | 766  | 356  | 152 | 114 | Am | NEGATIVE | NOT TESTE | 0    | Not Tested                                                                             |
| 418 | 0 | 30/09/2019 | I | 15 | Dead  | 12.2 | Myodes   | glareolus  | Male   | adult    | No  | Yes | Yes | Yes | Yes | 808  | 398  | 138 | 117 | Am | NEGATIVE | NOT TESTE | 0    | Not Tested                                                                             |
| 417 | 0 | 30/09/2019 | I | 3  | Dead  | 15.1 | Myodes   | glareolus  | Male   | adult    | No  | Yes | Yes | Yes | Yes | 738  | 153  | 155 | 112 | Am | NEGATIVE | NOT TESTE | 0    | Not Tested                                                                             |
| 416 | 1 | 30/09/2019 | E | 17 | Dead  | 16.1 | Myodes   | glareolus  | Male   | adult    | No  | Yes | Yes | Yes | Yes | 890  | 352  | 152 | 108 | Am | POSITIVE | POSITIVE  | 256  | Not Tested Mites                                                                       |
| 415 | 0 | 30/09/2019 | E | 24 | Dead  | 18.7 | Myodes   | glareolus  | Male   | adult    | No  | Yes | Yes | Yes | Yes | 907  | 508  | 184 | 125 | Am | NEGATIVE | NOT TESTE | 0    | Not Tested                                                                             |
| 414 | 0 | 30/09/2019 | I | 16 | Alive | 13.6 | Myodes   | glareolus  | Male   | adult    | Yes | Yes | Yes | Yes | Yes | 785  | 330  | 163 | 127 | Am | NEGATIVE | NOT TESTE | 0    | Not Tested Fleas                                                                       |
| 413 | 0 | 30/09/2019 | I | 21 | Alive | 15.4 | Myodes   | glareolus  | Male   | adult    | Yes | Yes | Yes | Yes | Yes | 823  | 386  | 153 | 115 | Am | NEGATIVE | NOT TESTE | 0    | Not Tested                                                                             |
| 412 | 1 | 30/09/2019 | I | 20 | Alive | 21.3 | Myodes   | glareolus  | Male   | adult    | Yes | Yes | Yes | Yes | Yes | 1046 | 470  | 154 | 130 | Am | POSITIVE | POSITIVE  | 128  | Not Tested                                                                             |
| 411 | 0 | 30/09/2019 | I | 12 | Alive | 14.9 | Myodes   | glareolus  | Male   | juvenile | Yes | Yes | Yes | Yes | Yes | 810  | 389  | 162 | 125 | Am | NEGATIVE | NOT TESTE | 0    | Not Tested                                                                             |
| 410 | 0 | 30/09/2019 | I | 10 | Alive | 17.6 | Myodes   | glareolus  | Female | adult    | Yes | Yes | Yes | Yes | Yes | 906  | 0    | 131 | 147 | Am | NEGATIVE | NOT TESTE | 0    | Not Tested No tail                                                                     |
| 409 | 0 | 30/09/2019 | I | 25 | Alive | 15.2 | Myodes   | glareolus  | Male   | adult    | Yes | Yes | Yes | Yes | Yes | 866  | 327  | 162 | 135 | Am | NEGATIVE | NOT TESTE | 0    | Not Tested                                                                             |
| 408 | 0 | 30/09/2019 | I | 7  | Alive | 17.4 | Myodes   | glareolus  | Female | adult    | Yes | Yes | Yes | Yes | Yes | 980  | 373  | 144 | 140 | Am | NEGATIVE | NOT TESTE | 0    | Not Tested Lactating                                                                   |
| 407 | 1 | 30/09/2019 | F | 8  | Alive | 29.1 | Apodemus | flavicolus | Male   | adult    | Yes | Yes | Yes | Yes | Yes | 1070 | 998  | 227 | 187 | Am | POSITIVE | POSITIVE  | 512  | NEGATIVE                                                                               |
| 406 | 0 | 30/09/2019 | F | 18 | Alive | 18.6 | Myodes   | glareolus  | Male   | adult    | Yes | Yes | Yes | Yes | Yes | 869  | 404  | 170 | 133 | Am | NEGATIVE | NOT TESTE | 0    | Not Tested                                                                             |
| 405 | 0 | 30/09/2019 | F | 17 | Alive | 15.7 | Myodes   | glareolus  | Male   | adult    | Yes | Yes | Yes | Yes | Yes | 870  | 410  | 174 | 113 | Am | NEGATIVE | NOT TESTE | 0    | Not Tested                                                                             |
| 404 | 0 | 30/09/2019 | F | 13 | Alive | 29.9 | Apodemus | flavicolus | Male   | adult    | Yes | Yes | Yes | Yes | Yes | 1020 | 1060 | 247 | 165 | Am | NEGATIVE | NOT TESTE | 0    | Not Tested                                                                             |
| 403 | 0 | 30/09/2019 | F | 6  | Alive | 13.8 | Myodes   | glareolus  | Male   | adult    | Yes | Yes | Yes | Yes | Yes | 849  | 419  | 173 | 140 | Am | NEGATIVE | NOT TESTE | 0    | Not Tested                                                                             |
| 402 | 0 | 30/09/2019 | F | 24 | Alive | 16.8 | Myodes   | glareolus  | Female | adult    | Yes | Yes | Yes | Yes | Yes | 909  | 463  | 173 | 126 | Am | POSITIVE | NEGATIVE  | 0    | Not Tested                                                                             |
| 401 | 0 | 30/09/2019 | G | 6  | Alive | 11.7 | Myodes   | glareolus  | Male   | juvenile | Yes | Yes | Yes | Yes | Yes | 770  | 255  | 150 | 115 | Am | NEGATIVE | NOT TESTE | 0    | Not Tested                                                                             |
| 400 | 1 | 30/09/2019 | I | 4  | Alive | 20.2 | Myodes   | glareolus  | Male   | adult    | Yes | Yes | Yes | Yes | Yes | 1006 | 389  | 154 | 120 | Am | POSITIVE | POSITIVE  | 256  | Not Tested                                                                             |
| 399 | 1 | 30/09/2019 | E | 5  | Alive | 17.8 | Apodemus | agraricus  | Female | adult    | Yes | Yes | Yes | Yes | Yes | 948  | 729  | 220 | 122 | Am | POSITIVE | POSITIVE  | 64   | NEGATIVE                                                                               |
| 398 | 1 | 30/09/2019 | E | 14 | Alive | 22.8 | Apodemus | flavicolus | Female | adult    | Yes | Yes | Yes | Yes | Yes | 986  | 953  | 266 | 180 | Am | POSITIVE | POSITIVE  | 32   | POSITIVE retested a couple times during 1-22 workshop- NEG                             |
| 397 | 1 | 30/09/2019 | G | 1  | Alive | 15.5 | Apodemus | agraricus  | Male   | adult    | Yes | Yes | Yes | Yes | Yes | 833  | 704  | 177 | 105 | Am | POSITIVE | POSITIVE  | 8192 | POSITIVE                                                                               |
| 396 | 1 | 30/09/2019 | I | 22 | Alive | 20   | Apodemus | flavicolus | Male   | juvenile | Yes | Yes | Yes | Yes | Yes | 968  | 968  | 240 | 180 | Am | POSITIVE | POSITIVE  | 128  | POSITIVE                                                                               |
| 395 | 1 | 30/09/2019 | E | 9  | Alive | 13.3 | Myodes   | glareolus  | Male   | adult    | Yes | Yes | Yes | Yes | Yes | 753  | 458  | 166 | 132 | Am | NEGATIVE | POSITIVE  | 1024 | Not Tested                                                                             |
| 394 | 1 | 30/09/2019 | E | 6  | Alive | 16.8 | Myodes   | glareolus  | Female | adult    | Yes | Yes | Yes | Yes | Yes | 880  | 401  | 179 | 159 | Am | POSITIVE | POSITIVE  | 256  | Not Tested                                                                             |
| 393 | 0 | 30/09/2019 | F | 8  | Alive | 22.3 | Myodes   | glareolus  | Male   | adult    | Yes | Yes | Yes | Yes | Yes | 1040 | 515  | 171 | 170 | Am | NEGATIVE | NOT TESTE | 0    | Not Tested                                                                             |
| 392 | 0 | 30/09/2019 | D | 38 | Dead  | 6.9  | Sorex    | minutus    | Male   | adult    | No  | Yes | Yes | Yes | Yes | 685  | 420  | 130 | 55  | Am | NEGATIVE | NOT TESTE | 0    | Not Tested                                                                             |
| 391 | 1 | 30/09/2019 | D | 32 | Dead  | 22.5 | Apodemus | flavicolus | Male   | adult    | No  | Yes | Yes | Yes | Yes | 939  | 1039 | 275 | 175 | Am | POSITIVE | POSITIVE  | 2048 | POSITIVE                                                                               |
| 390 | 0 | 30/09/2019 | D | 7  | Dead  | 14.1 | Myodes   | glareolus  | Male   | adult    | No  | Yes | Yes | Yes | Yes | 893  | 482  | 168 | 131 | Am | NEGATIVE | NOT TESTE | 0    | Not Tested                                                                             |
| 389 | 0 | 30/09/2019 | D | 34 | Dead  | 8.1  | Sorex    | minutus    | Male   | adult    | No  | Yes | Yes | Yes | Yes | 684  | 415  | 140 | 60  | Am | NEGATIVE | NOT TESTE | 0    | Not Tested                                                                             |
| 388 | 0 | 30/09/2019 | D | 42 | Dead  | 8    | Sorex    | minutus    | Male   | adult    | No  | Yes | Yes | Yes | Yes | 670  | 344  | 103 | 60  | Am | NEGATIVE | NOT TESTE | 0    | Not Tested                                                                             |
| 387 | 0 | 30/09/2019 | D | 19 | Dead  | 7.4  | Sorex    | minutus    | Male   | adult    | No  | Yes | Yes | Yes | Yes | 710  | 388  | 119 | 40  | Am | NEGATIVE | NOT TESTE | 0    | Not Tested                                                                             |
| 386 | 0 | 30/09/2019 | D | 5  | Dead  | 8.1  | Sorex    | minutus    | Female | adult    | No  | Yes | Yes | Yes | Yes | 630  | 397  | 104 | 40  | Am | NEGATIVE | NOT TESTE | 0    | Not Tested                                                                             |
| 385 | 0 | 30/09/2019 | C | 45 | Dead  | 13.9 | Myodes   | glareolus  | Male   | adult    | No  | Yes | Yes | Yes | Yes | 774  | 426  | 158 | 148 | Am | NEGATIVE | NOT TESTE | 0    | Not Tested                                                                             |
| 384 | 0 | 30/09/2019 | C | 11 | Dead  | 13.2 | Myodes   | glareolus  | Male   | juvenile | No  | Yes | Yes | Yes | Yes | 823  | 369  | 163 | 139 | Am | NEGATIVE | NOT TESTE | 0    | Not Tested                                                                             |
| 383 | 0 | 30/09/2019 | C | 43 | Alive | 17.6 | Apodemus | agraricus  | Male   | adult    | Yes | Yes | Yes | Yes | Yes | 885  | 607  | 162 | 100 | Am | NEGATIVE | NOT TESTE | 0    | Not Tested infected tail                                                               |
| 382 | 1 | 30/09/2019 | C | 41 | Dead  | 9.5  | Myodes   | glareolus  | Male   | juvenile | No  | Yes | Yes | Yes | Yes | 648  | 345  | 145 | 115 | Am | POSITIVE | POSITIVE  | 128  | Not Tested                                                                             |
| 381 | 0 | 30/09/2019 | C | 16 | Dead  | 13.7 | Myodes   | glareolus  | Male   | juvenile | No  | Yes | Yes | Yes | Yes | 398  | 389  | 166 | 165 | Am | NEGATIVE | NOT TESTE | 0    | Not Tested                                                                             |
| 380 | 1 | 30/09/2019 | C | 49 | Dead  | 18.7 | Myodes   | glareolus  | Male   | adult    | No  | Yes | Yes | Yes | Yes | 957  | 488  | 153 | 169 | Am | POSITIVE | POSITIVE  | 2048 | Not Tested                                                                             |
| 379 | 0 | 30/09/2019 | C | 29 | Dead  | 7    | Sorex    | minutus    | Female | adult    | No  | Yes | Yes | Yes | Yes | 594  | 370  | 87  | 26  | Am | NEGATIVE | NOT TESTE | 0    | Not Tested                                                                             |
| 378 | 0 | 30/09/2019 | D | 8  | Alive | 15   | Apodemus | agraricus  | Female | adult    | Yes | Yes | Yes | Yes | Yes | 819  | 719  | 210 | 119 | Am | NEGATIVE | NOT TESTE | 0    | Not Tested                                                                             |
| 377 | 0 | 30/09/2019 | D | 6  | Alive | 13.3 | Myodes   | glareolus  | Female | adult    | Yes | Yes | Yes | Yes | Yes | 844  | 395  | 171 | 115 | Am | NEGATIVE | NOT TESTE | 0    | Not Tested                                                                             |
| 376 | 0 | 30/09/2019 | D | 25 | Alive | 20.7 | Apodemus | flavicolus | Male   | juvenile | Yes | Yes | Yes | Yes | Yes | 930  | 970  | 220 | 160 | Am | NEGATIVE | NOT TESTE | 0    | Not Tested                                                                             |
| 375 | 0 | 30/09/2019 | D | 43 | Alive | 26.7 | Apodemus | flavicolus | Female | adult    | Yes | Yes | Yes | Yes | Yes | 1080 | 1080 | 264 | 177 | Am | NEGATIVE | NOT TESTE | 0    | Not Tested                                                                             |
| 374 | 0 | 30/09/2019 | D | 22 | Alive | 21.5 | Apodemus | flavicolus | Female | juvenile | Yes | Yes | Yes | Yes | Yes | 950  | 980  | 244 | 180 | Am | NEGATIVE | NOT TESTE | 0    | Not Tested                                                                             |
| 373 | 0 | 30/09/2019 | D | 24 | Alive | 13.7 | Myodes   | glareolus  | Male   | adult    | Yes | Yes | Yes | Yes | Yes | 898  | 440  | 180 | 120 | Am | NEGATIVE | NOT TESTE | 0    | Not Tested                                                                             |
| 372 | 0 | 30/09/2019 | D | 23 | Alive | 18.9 | Apodemus | agraricus  | Male   | adult    | Yes | Yes | Yes | Yes | Yes | 967  | 940  | 235 | 168 | Am | NEGATIVE | NOT TESTE | 0    |                                                                                        |

|     |   |            |   |    |       |      |          |            |        |          |     |     |     |     |     |      |      |     |     |    |          |           |      |                                                                    |
|-----|---|------------|---|----|-------|------|----------|------------|--------|----------|-----|-----|-----|-----|-----|------|------|-----|-----|----|----------|-----------|------|--------------------------------------------------------------------|
| 349 | 0 | 29/09/2019 | E | 21 | Dead  | 15.2 | Myodes   | glareolus  | Female | adult    | No  | Yes | Yes | Yes | Yes | 763  | 425  | 163 | 113 | Am | NEGATIVE | NOT TESTE | 0    | Not Tested                                                         |
| 348 | 0 | 29/09/2019 | F | 5  | Dead  | 15.1 | Myodes   | glareolus  | Female | adult    | No  | Yes | Yes | Yes | Yes | 744  | 363  | 180 | 175 | Am | NEGATIVE | NOT TESTE | 0    | Not Tested                                                         |
| 347 | 0 | 29/09/2019 | E | 19 | Dead  | 15.1 | Myodes   | glareolus  | Male   | adult    | No  | Yes | Yes | Yes | Yes | 726  | 440  | 142 | 98  | Am | NEGATIVE | NOT TESTE | 0    | Not Tested Fleas                                                   |
| 346 | 1 | 29/09/2019 | F | 15 | Dead  | 16   | Myodes   | glareolus  | Male   | adult    | No  | Yes | Yes | Yes | Yes | 746  | 424  | 146 | 110 | Am | POSITIVE | POSITIVE  | 64   | Not Tested                                                         |
| 345 | 1 | 29/09/2019 | G | 25 | Dead  | 15.6 | Apodemus | agrarius   | Male   | adult    | No  | Yes | Yes | Yes | Yes | 860  | 636  | 165 | 90  | Am | POSITIVE | POSITIVE  | 2048 | NEGATIVE                                                           |
| 344 | 0 | 29/09/2019 | E | 12 | Dead  | 15.3 | Myodes   | glareolus  | Male   | adult    | No  | Yes | Yes | Yes | Yes | 821  | 363  | 164 | 105 | Am | NEGATIVE | NOT TESTE | 0    | Not Tested                                                         |
| 343 | 1 | 29/09/2019 | G | 19 | Dead  | 5.3  | Apodemus | agrarius   | Male   | juvenile | No  | Yes | Yes | Yes | Yes | 520  | 418  | 146 | 172 | Am | POSITIVE | POSITIVE  | 4096 | POSITIVE                                                           |
| 342 | 0 | 29/09/2019 | G | 15 | Dead  | 17.8 | Myodes   | glareolus  | Female | adult    | No  | Yes | Yes | Yes | Yes | 893  | 302  | 156 | 111 | Am | NEGATIVE | NOT TESTE | 0    | Not Tested                                                         |
| 341 | 0 | 29/09/2019 | G | 1  | Dead  | 14.8 | Apodemus | agrarius   | Male   | adult    | No  | Yes | Yes | Yes | Yes | 790  | 682  | 155 | 77  | Am | NEGATIVE | NOT TESTE | 0    | Not Tested Moribund, no liquid in Lungs tube                       |
| 340 | 0 | 29/09/2019 | G | 3  | Alive | 15.4 | Apodemus | agrarius   | Male   | adult    | Yes | Yes | Yes | Yes | Yes | 885  | 585  | 188 | 90  | Am | NEGATIVE | NOT TESTE | 0    | Not Tested                                                         |
| 339 | 0 | 29/09/2019 | E | 8  | Alive | 14.8 | Myodes   | glareolus  | Female | adult    | Yes | Yes | Yes | Yes | Yes | 318  | 315  | 137 | 113 | Am | NEGATIVE | NOT TESTE | 0    | Not Tested                                                         |
| 338 | 1 | 29/09/2019 | E | 14 | Alive | 15.7 | Myodes   | glareolus  | Female | adult    | Yes | Yes | Yes | Yes | Yes | 930  | 417  | 174 | 89  | Am | POSITIVE | POSITIVE  | 512  | Not Tested                                                         |
| 337 | 0 | 29/09/2019 | E | 7  | Alive | 13.8 | Apodemus | flavicolus | Male   | juvenile | Yes | Yes | Yes | Yes | Yes | 769  | 817  | 225 | 149 | Am | NEGATIVE | NOT TESTE | 0    | Not Tested                                                         |
| 336 | 0 | 29/09/2019 | E | 18 | Alive | 19.4 | Myodes   | glareolus  | Male   | adult    | Yes | Yes | Yes | Yes | Yes | 954  | 465  | 154 | 138 | Am | NEGATIVE | NOT TESTE | 0    | Not Tested                                                         |
| 335 | 0 | 29/09/2019 | F | 1  | Alive | 20.2 | Apodemus | flavicolus | Male   | juvenile | Yes | Yes | Yes | Yes | Yes | 908  | 910  | 237 | 165 | Am | NEGATIVE | NOT TESTE | 0    | Not Tested                                                         |
| 334 | 1 | 29/09/2019 | E | 15 | Alive | 19.5 | Myodes   | glareolus  | Female | adult    | Yes | Yes | Yes | Yes | Yes | 979  | 478  | 169 | 154 | Am | POSITIVE | POSITIVE  | 8192 | Not Tested Breastfeeding (lactating), little blood taken, Moribund |
| 333 | 0 | 29/09/2019 | E | 13 | Alive | 15.9 | Myodes   | glareolus  | Male   | adult    | Yes | Yes | Yes | Yes | Yes | 874  | 356  | 156 | 124 | Am | NEGATIVE | NOT TESTE | 0    | Not Tested                                                         |
| 332 | 0 | 29/09/2019 | F | 21 | Alive | 24   | Apodemus | flavicolus | Male   | adult    | Yes | Yes | Yes | Yes | Yes | 998  | 960  | 245 | 184 | Am | NEGATIVE | NEGATIVE  | 0    | Not Tested                                                         |
| 331 | 0 | 29/09/2019 | F | 8  | Alive | 31.2 | Apodemus | flavicolus | Male   | adult    | Yes | Yes | Yes | Yes | Yes | 1058 | 1001 | 210 | 185 | Am | NEGATIVE | NOT TESTE | 0    | Not Tested                                                         |
| 330 | 0 | 29/09/2019 | F | 22 | Alive | 24.6 | Apodemus | flavicolus | Male   | adult    | Yes | Yes | Yes | Yes | Yes | 995  | 948  | 236 | 164 | Am | NEGATIVE | NEGATIVE  | 0    | Not Tested                                                         |
| 329 | 1 | 29/09/2019 | F | 25 | Alive | 28.8 | Apodemus | flavicolus | Male   | adult    | Yes | Yes | Yes | Yes | Yes | 1011 | 951  | 237 | 172 | Am | POSITIVE | POSITIVE  | 1024 | NEGATIVE Mites                                                     |
| 328 | 0 | 29/09/2019 | F | 10 | Alive | 30.9 | Apodemus | flavicolus | Male   | adult    | Yes | Yes | Yes | Yes | Yes | 1075 | 1055 | 256 | 155 | Am | NEGATIVE | NOT TESTE | 0    | Not Tested                                                         |
| 327 | 0 | 29/09/2019 | F | 7  | Alive | 26.1 | Apodemus | flavicolus | Male   | adult    | Yes | Yes | Yes | Yes | Yes | 1003 | 0    | 244 | 167 | Am | NEGATIVE | NOT TESTE | 0    | Not Tested Missing part of tail                                    |
| 326 | 1 | 29/09/2019 | G | 8  | Alive | 17.6 | Apodemus | agrarius   | Male   | adult    | Yes | Yes | Yes | Yes | Yes | 898  | 675  | 202 | 109 | Am | POSITIVE | POSITIVE  | 64   | POSITIVE                                                           |
| 325 | 0 | 29/09/2019 | E | 24 | Alive | 33.5 | Apodemus | flavicolus | Male   | adult    | Yes | Yes | Yes | Yes | Yes | 1059 | 0    | 256 | 150 | Am | NEGATIVE | NOT TESTE | 0    | Not Tested Broken tail                                             |
| 324 | 0 | 29/09/2019 | E | 24 | Alive | 35.5 | Apodemus | flavicolus | Female | adult    | Yes | Yes | Yes | Yes | Yes | 1105 | 1002 | 252 | 192 | Am | NEGATIVE | NOT TESTE | 0    | Not Tested Helminth eggs                                           |
| 323 | 0 | 29/09/2019 | E | 11 | Alive | 15.1 | Myodes   | glareolus  | Female | adult    | Yes | Yes | Yes | Yes | Yes | 773  | 399  | 148 | 125 | Am | NEGATIVE | NOT TESTE | 0    | Not Tested                                                         |
| 322 | 0 | 29/09/2019 | F | 24 | Dead  | 15.9 | Myodes   | glareolus  | Male   | adult    | No  | Yes | Yes | Yes | Yes | 807  | 416  | 180 | 116 | Am | NEGATIVE | NOT TESTE | 0    | Not Tested Moribund                                                |
| 321 | 1 | 29/09/2019 | F | 24 | Alive | 13.6 | Myodes   | glareolus  | Female | adult    | Yes | Yes | Yes | Yes | Yes | 841  | 413  | 171 | 124 | Am | POSITIVE | POSITIVE  | 8192 | Not Tested                                                         |
| 320 | 1 | 29/09/2019 | C | 42 | Dead  | 8.3  | Myodes   | glareolus  | Male   | juvenile | No  | Yes | Yes | Yes | Yes | 599  | 226  | 164 | 113 | Am | POSITIVE | POSITIVE  | 128  | Not Tested                                                         |
| 319 | 0 | 29/09/2019 | C | 18 | Dead  | 13.3 | Myodes   | glareolus  | Female | adult    | No  | Yes | Yes | Yes | Yes | 720  | 379  | 153 | 123 | Am | NEGATIVE | NOT TESTE | 0    | Not Tested                                                         |
| 318 | 1 | 29/09/2019 | C | 47 | Dead  | 12.7 | Myodes   | glareolus  | Male   | adult    | No  | Yes | Yes | Yes | Yes | 725  | 363  | 164 | 105 | Am | POSITIVE | POSITIVE  | 256  | NEGATIVE used kidney for IFA titer                                 |
| 317 | 0 | 29/09/2019 | C | 11 | Dead  | 16   | Myodes   | glareolus  | Female | adult    | No  | Yes | Yes | Yes | Yes | 811  | 426  | 168 | 119 | Am | NEGATIVE | NOT TESTE | 0    | Not Tested                                                         |
| 316 | 0 | 29/09/2019 | C | 30 | Dead  | 8.5  | Sorex    | minutus    | Male   | adult    | No  | Yes | Yes | Yes | Yes | 696  | 377  | 125 | 71  | Am | NEGATIVE | NOT TESTE | 0    | Not Tested                                                         |
| 315 | 1 | 29/09/2019 | C | 45 | Dead  | 8.8  | Myodes   | glareolus  | Male   | juvenile | No  | Yes | Yes | Yes | Yes | 637  | 327  | 163 | 104 | Am | POSITIVE | POSITIVE  | 128  | Not Tested                                                         |
| 314 | 0 | 29/09/2019 | C | 43 | Dead  | 7.8  | Sorex    | minutus    | Female | adult    | No  | Yes | Yes | Yes | Yes | 672  | 412  | 138 | 60  | Am | NEGATIVE | NOT TESTE | 0    | Not Tested                                                         |
| 313 | 0 | 29/09/2019 | C | 27 | Dead  | 7.8  | Sorex    | minutus    | Male   | adult    | No  | Yes | Yes | Yes | Yes | 655  | 342  | 113 | 65  | Am | NEGATIVE | NOT TESTE | 0    | Not Tested                                                         |
| 311 | 0 | 29/09/2019 | C | 34 | Dead  | 7.3  | Sorex    | minutus    | Male   | adult    | No  | Yes | Yes | Yes | Yes | 678  | 363  | 134 | 56  | Am | NEGATIVE | NOT TESTE | 0    | Not Tested                                                         |
| 310 | 0 | 29/09/2019 | C | 41 | Dead  | 8.7  | Myodes   | glareolus  | Female | juvenile | No  | Yes | Yes | Yes | Yes | 603  | 305  | 165 | 94  | Am | POSITIVE | NEGATIVE  | 0    | Not Tested                                                         |
| 309 | 0 | 29/09/2019 | D | 17 | Dead  | 6.02 | Sorex    | minutus    | Male   | adult    | No  | Yes | Yes | Yes | Yes | 650  | 322  | 155 | 64  | Am | NEGATIVE | NOT TESTE | 0    | Not Tested                                                         |
| 308 | 1 | 29/09/2019 | D | 37 | Dead  | 18.2 | Myodes   | glareolus  | Male   | adult    | No  | Yes | Yes | Yes | Yes | 902  | 453  | 164 | 109 | Am | POSITIVE | POSITIVE  | 128  | Not Tested                                                         |
| 307 | 0 | 29/09/2019 | D | 29 | Dead  | 7.4  | Sorex    | minutus    | Male   | adult    | No  | Yes | Yes | Yes | Yes | 679  | 327  | 124 | 48  | Am | NEGATIVE | NOT TESTE | 0    | Not Tested                                                         |
| 306 | 0 | 29/09/2019 | D | 2  | Dead  | 13   | Apodemus | agrarius   | Male   | adult    | No  | Yes | Yes | Yes | Yes | 715  | 655  | 187 | 112 | Am | NEGATIVE | NEGATIVE  | 0    | Not Tested                                                         |
| 305 | 0 | 29/09/2019 | D | 43 | Dead  | 4.8  | Myodes   | glareolus  | Female | adult    | No  | Yes | Yes | Yes | Yes | 759  | 363  | 151 | 109 | Am | NEGATIVE | NOT TESTE | 0    | Not Tested                                                         |
| 304 | 0 | 29/09/2019 | D | 45 | Dead  | 7.5  | Sorex    | minutus    | Male   | adult    | No  | Yes | Yes | Yes | Yes | 589  | 141  | 113 | 166 | Am | NEGATIVE | NOT TESTE | 0    | Not Tested                                                         |
| 303 | 0 | 29/09/2019 | C | 44 | Alive | 16.6 | Myodes   | glareolus  | Male   | adult    | Yes | Yes | Yes | Yes | Yes | 879  | 362  | 176 | 155 | Am | NEGATIVE | NOT TESTE | 0    | Not Tested                                                         |
| 302 | 0 | 29/09/2019 | C | 29 | Alive | 23.5 | Myodes   | glareolus  | Female | adult    | Yes | Yes | Yes | Yes | Yes | 1006 | 431  | 121 | 131 | Am | NEGATIVE | NOT TESTE | 0    | Not Tested                                                         |
| 301 | 0 | 29/09/2019 | C | 37 | Alive | 11.9 | Myodes   | glareolus  | Female | adult    | Yes | Yes | Yes | Yes | Yes | 850  | 316  | 169 | 105 | Am | NEGATIVE | NOT TESTE | 0    | Not Tested                                                         |
| 300 | 0 | 29/09/2019 | C | 25 | Alive | 17.8 | Apodemus | flavicolus | Male   | juvenile | Yes | Yes | Yes | Yes | Yes | 885  | 846  | 210 | 165 | Am | NEGATIVE | NOT TESTE | 0    | Not Tested                                                         |
| 299 | 0 | 29/09/2019 | C | 19 | Alive | 12.3 | Myodes   | glareolus  | Male   | juvenile | Yes | Yes | Yes | Yes | Yes | 827  | 392  | 166 | 106 | Am | NEGATIVE | NOT TESTE | 0    | Not Tested                                                         |
| 298 | 0 | 29/09/2019 | C | 8  | Alive | 26.3 | Apodemus | flavicolus | Male   | adult    | Yes | Yes | Yes | Yes | Yes | 973  | 1002 | 235 | 166 | Am | NEGATIVE | NOT TESTE | 0    | Not Tested                                                         |
| 297 | 0 | 29/09/2019 | C | 48 | Alive | 16.5 | Apodemus | flavicolus | Female | juvenile | Yes | Yes | Yes | Yes | Yes | 850  | 896  | 222 | 165 | Am | NEGATIVE | NOT TESTE | 0    | Not Tested                                                         |
| 296 | 0 | 29/09/2019 | D | 1  | Alive | 22.2 | Apodemus | flavicolus | Male   | juvenile | Yes | Yes | Yes | Yes | Yes | 954  | 1002 | 229 | 167 | Am | NEGATIVE | NOT TESTE | 0    | Not Tested                                                         |
| 295 | 0 | 29/09/2019 | D | 6  | Alive | 14.2 | Apodemus | agrarius   | Female | juvenile | Yes | Yes | Yes | Yes | Yes | 854  | 642  | 175 | 101 | Am | NEGATIVE | NOT TESTE | 0    | Not Tested                                                         |
| 294 | 0 | 29/09/2019 | D | 42 | Alive | 34.9 | Apodemus | flavicolus | Male   | adult    | Yes | Yes | Yes | Yes | Yes | 1074 | 1071 | 250 | 170 | Am | NEGATIVE | NOT TESTE | 0    | Not Tested Fly eggs                                                |
| 293 | 0 | 29/09/2019 | D | 23 | Alive | 19.8 | Apodemus | flavicolus | Female | juvenile | Yes | Yes | Yes | Yes | Yes | 904  | 952  | 227 | 135 | Am | NEGATIVE | NOT TESTE | 0    | Not Tested                                                         |
| 292 | 0 | 29/09/2019 | D | 19 | Alive | 33.3 | Apodemus | flavicolus | Male   | adult    | Yes | Yes | Yes | Yes | Yes | 1086 | 996  | 262 | 174 | Am | NEGATIVE | NOT TESTE | 0    | Not Tested                                                         |
| 291 | 0 | 29/09/2019 | D | 32 | Alive | 14.7 | Apodemus | agrarius   | Male   | adult    | Yes | Yes | Yes | Yes | Yes | 806  | 579  | 179 | 116 | Am | NEGATIVE | NOT TESTE | 0    | Not Tested Blood and muscle tubes are mixed                        |
| 290 | 0 | 29/09/2019 | D | 11 | Alive | 23.5 | Apodemus | flavicolus | Male   | adult    | Yes | Yes | Yes | Yes | Yes | 948  | 884  | 243 | 169 | Am | POSITIVE | NEGATIVE  | 0    | Not Tested                                                         |
| 289 | 0 | 29/09/2019 | D | 7  | Alive | 14.1 | Apodemus | agrarius   | Male   | adult    | Yes | Yes | Yes | Yes | Yes | 846  | 642  | 182 | 107 | Am | NEGATIVE | NOT TESTE | 0    | NEGATIVE                                                           |
| 288 | 1 | 29/09/2019 | D | 14 | Alive | 34.8 | Apodemus | flavicolus | Male   | adult    | Yes | Yes | Yes | Yes | Yes | 1079 | 1018 | 250 | 198 | Am | POSITIVE | POSITIVE  | 1024 | POSITIVE                                                           |
| 287 | 0 | 29/09/2019 | D | 28 | Alive | 28.5 | Apodemus | flavicolus | Male   | adult    | Yes | Yes | Yes | Yes | Yes | 955  | 976  | 236 | 166 | Am | NEGATIVE | NOT TESTE | 0    | Not Tested                                                         |
| 286 | 1 | 29/09/2019 | D | 33 | Alive | 14.1 | Apodemus | agrarius   | Male   | adult    | Yes | Yes | Yes | Yes | Yes | 848  | 580  | 185 | 119 | Am | POSITIVE | POSITIVE  | 128  | Not Tested                                                         |
| 285 | 0 | 29/09/2019 | D | 34 | Alive | 13.6 | Myodes   | glareolus  | Female | adult    | Yes | Yes | Yes | Yes | Yes | 843  | 338  | 156 | 121 | Am | NEGATIVE | NOT TESTE | 0    | Not Tested                                                         |
| 284 | 1 | 29/09/2019 | D | 38 | Alive | 32.2 | Apodemus | flavicolus | Male   | adult    | Yes | Yes | Yes | Yes | Yes | 1049 | 988  | 241 | 184 | Am | POSITIVE | POSITIVE  | 64   | Not Tested                                                         |
| 283 | 0 | 29/09/2019 | D | 25 | Alive | 7.4  | Sorex    | minutus    | Female | adult    | Yes | Yes | Yes | Yes | Yes | 600  | 362  | 124 | 68  | Am | NEGATIVE | NOT TESTE | 0    | Not Tested                                                         |
| 282 | 0 | 26/09/2019 | A | 13 | Alive | 23.8 | Apodemus | flavicolus | Female | adult    | Yes | Yes | Yes | Yes | Yes | 992  | 908  | 24  |     |    |          |           |      |                                                                    |

|     |                |          |      |                     |        |          |     |     |     |     |     |      |      |     |     |    |           |           |      |            |                                 |
|-----|----------------|----------|------|---------------------|--------|----------|-----|-----|-----|-----|-----|------|------|-----|-----|----|-----------|-----------|------|------------|---------------------------------|
| 259 | 0 26/09/2019 C | 35 Alive | 13.4 | Myodes glareolus    | Male   | adult    | No  | Yes | Yes | Yes | Yes | 778  | 367  | 165 | 123 | Am | NEGATIVE  | NOT TESTE | 0    | Not Tested | Flea talpa                      |
| 258 | 1 26/09/2019 C | 30 Dead  | 21.7 | Myodes glareolus    | Male   | adult    | No  | Yes | Yes | Yes | Yes | 973  | 482  | 164 | 147 | Am | POSITIVE  | POSITIVE  | 1024 | Not Tested |                                 |
| 257 | 1 26/09/2019 A | 17 Alive | 24.4 | Apodemus agrarius   | Male   | adult    | Yes | Yes | Yes | Yes | Yes | 950  | 707  | 186 | 109 | Am | POSITIVE  | POSITIVE  | 4096 | POSITIVE   |                                 |
| 256 | 1 26/09/2019 C | 39 Dead  | 14.3 | Myodes glareolus    | Female | adult    | No  | Yes | Yes | Yes | Yes | 837  | 407  | 171 | 139 | Am | POSITIVE  | POSITIVE  | 1024 | Not Tested | Marked as 257                   |
| 255 | 0 26/09/2019 A | 20 Alive | 13.8 | Apodemus flaviculus | Female | juvenile | Yes | Yes | Yes | Yes | Yes | 783  | 784  | 214 | 146 | Am | NEGATIVE  | NOT TESTE | 0    | Not Tested | Mites                           |
| 254 | 0 26/09/2019 A | 11 Alive | 25.5 | Apodemus flaviculus | Female | adult    | Yes | Yes | Yes | Yes | Yes | 920  | 927  | 246 | 174 | Am | NEGATIVE  | NOT TESTE | 0    | Not Tested |                                 |
| 253 | 0 26/09/2019 B | 2 Dead   | 31.2 | Apodemus flaviculus | Female | adult    | No  | Yes | Yes | Yes | Yes | 929  | 1039 | 249 | 184 | Am | NEGATIVE  | NOT TESTE | 0    | Not Tested |                                 |
| 252 | 1 26/09/2019 C | 42 Alive | 9.1  | Myodes glareolus    | Male   | juvenile | Yes | Yes | Yes | Yes | Yes | 657  | 334  | 157 | 83  | Am | POSITIVE  | POSITIVE  | 256  | Not Tested | obtained IFA titer using kidney |
| 251 | 0 26/09/2019 A | 30 Alive | 14.8 | Myodes glareolus    | Male   | adult    | Yes | Yes | Yes | Yes | Yes | 796  | 424  | 156 | 123 | Am | NEGATIVE  | NOT TESTE | 0    | Not Tested |                                 |
| 250 | 0 26/09/2019 B | 10 Dead  | 14.3 | Myodes glareolus    | Male   | juvenile | No  | Yes | Yes | Yes | Yes | 759  | 397  | 176 | 124 | Am | NEGATIVE  | NOT TESTE | 0    | Not Tested |                                 |
| 249 | 0 26/09/2019 A | 44 Alive | 10.9 | Muscardin aranus    | Female | adult    | Yes | Yes | Yes | Yes | Yes | 749  | 625  | 158 | 91  | Am | POSITIVE  | NEGATIVE  | 0    | Not Tested | Dormouse, little blood drawn    |
| 247 | 0 26/09/2019 B | 18 Alive | 16.1 | Apodemus glareolus  | Male   | juvenile | Yes | Yes | Yes | Yes | Yes | 778  | 855  | 215 | 168 | Am | NEGATIVE  | NOT TESTE | 0    | Not Tested |                                 |
| 246 | 0 26/09/2019 B | 36 Alive | 15.8 | Myodes glareolus    | Male   | adult    | Yes | Yes | Yes | Yes | Yes | 836  | 411  | 169 | 132 | Am | NEGATIVE  | NOT TESTE | 0    | Not Tested |                                 |
| 245 | 0 26/09/2019 B | 28 Dead  | 25.6 | Apodemus flaviculus | Male   | adult    | No  | Yes | Yes | Yes | Yes | 904  | 730  | 234 | 176 | Am | NEGATIVE  | NOT TESTE | 0    | Not Tested | Fleas                           |
| 244 | 0 26/09/2019 B | 42 Alive | 17.2 | Myodes glareolus    | Male   | juvenile | Yes | Yes | Yes | Yes | Yes | 833  | 406  | 168 | 125 | Am | NEGATIVE  | NOT TESTE | 0    | Not Tested | Little blood                    |
| 243 | 1 26/09/2019 C | 36 Dead  | 20.3 | Myodes glareolus    | Male   | adult    | No  | Yes | Yes | Yes | Yes | 903  | 482  | 164 | 130 | Am | POSITIVE  | POSITIVE  | 4096 | Not Tested |                                 |
| 242 | 0 26/09/2019 B | 46 Alive | 17.3 | Myodes glareolus    | Male   | adult    | Yes | Yes | Yes | Yes | Yes | 880  | 394  | 156 | 122 | Am | NEGATIVE  | NOT TESTE | 0    | Not Tested |                                 |
| 241 | 0 26/09/2019 B | 26 Alive | 15.6 | Myodes glareolus    | Male   | adult    | Yes | Yes | Yes | Yes | Yes | 790  | 407  | 173 | 139 | Am | NEGATIVE  | NOT TESTE | 0    | Not Tested | Fleas                           |
| 240 | 0 26/09/2019 B | 32 Alive | 23.3 | Apodemus flaviculus | Male   | adult    | Yes | Yes | Yes | Yes | Yes | 925  | 879  | 243 | 167 | Am | NEGATIVE  | NOT TESTE | 0    | Not Tested |                                 |
| 239 | 1 26/09/2019 C | 11 Dead  | 23   | Myodes glareolus    | Male   | adult    | No  | Yes | Yes | Yes | Yes | 925  | 517  | 169 | 135 | Am | POSITIVE  | POSITIVE  | 512  | Not Tested |                                 |
| 238 | 0 26/09/2019 B | 31 Alive | 22.1 | Myodes glareolus    | Female | adult    | Yes | Yes | Yes | Yes | Yes | 872  | 535  | 167 | 138 | Am | NEGATIVE  | NOT TESTE | 0    | Not Tested | Little blood drawn              |
| 237 | 0 26/09/2019 B | 19 Alive | 21   | Apodemus flaviculus | Female | adult    | Yes | Yes | Yes | Yes | Yes | 904  | 910  | 230 | 166 | Am | NEGATIVE  | NOT TESTE | 0    | Not Tested |                                 |
| 236 | 0 26/09/2019 B | 1 Alive  | 30   | Apodemus flaviculus | Male   | adult    | Yes | Yes | Yes | Yes | Yes | 978  | 992  | 235 | 186 | Am | POSITIVE  | NEGATIVE  | 0    | Not Tested | Mites                           |
| 235 | 0 26/09/2019 B | 50 Alive | 24   | Apodemus flaviculus | Female | adult    | Yes | Yes | Yes | Yes | Yes | 885  | 950  | 254 | 166 | Am | NEGATIVE  | NOT TESTE | 0    | Not Tested |                                 |
| 234 | 0 26/09/2019 B | 41 Alive | 21   | Apodemus flaviculus | Female | adult    | Yes | Yes | Yes | Yes | Yes | 876  | 989  | 240 | 182 | Am | POSITIVE  | NEGATIVE  | 0    | Not Tested | Fleas, talpa                    |
| 233 | 1 26/09/2019 C | 5 Alive  | 33.6 | Apodemus flaviculus | Male   | adult    | Yes | Yes | Yes | Yes | Yes | 1068 | 1036 | 242 | 195 | Am | POSITIVE  | POSITIVE  | 512  | NEGATIVE   |                                 |
| 232 | 0 26/09/2019 C | 9 Alive  | 9.3  | Mus musculus        | Male   | adult    | Yes | Yes | Yes | Yes | Yes | 680  | 649  | 157 | 126 | Am | NEGATIVE  | NOT TESTE | 0    | Not Tested | Mus musculus                    |
| 231 | 1 26/09/2019 C | 7 Alive  | 14.1 | Apodemus agrarius   | Male   | adult    | Yes | Yes | Yes | Yes | Yes | 622  | 622  | 162 | 119 | Am | POSITIVE  | POSITIVE  | 64   | POSITIVE   |                                 |
| 230 | 0 26/09/2019 C | 37 Alive | 16.4 | Apodemus agrarius   | Male   | adult    | Yes | Yes | Yes | Yes | Yes | 782  | 681  | 197 | 93  | Am | NEGATIVE  | NOT TESTE | 0    | Not Tested |                                 |
| 229 | 0 26/09/2019 C | 24 Alive | 30   | Apodemus flaviculus | Male   | adult    | Yes | Yes | Yes | Yes | Yes | 981  | 1005 | 232 | 168 | Am | NEGATIVE  | NOT TESTE | 0    | Not Tested |                                 |
| 228 | 0 26/09/2019 C | 6 Alive  | 21.5 | Apodemus flaviculus | Female | adult    | Yes | Yes | Yes | Yes | Yes | 869  | 897  | 238 | 173 | Am | POSITIVE  | NEGATIVE  | 0    | Not Tested |                                 |
| 227 | 0 26/09/2019 D | 34 Dead  | 14.9 | Myodes glareolus    | Male   | adult    | No  | Yes | Yes | Yes | Yes | 796  | 375  | 172 | 110 | Am | NEGATIVE  | NOT TESTE | 0    | Not Tested |                                 |
| 226 | 0 26/09/2019 C | 10 Alive | 20.5 | Apodemus flaviculus | Male   | adult    | Yes | Yes | Yes | Yes | Yes | 957  | 161  | 222 | 161 | Am | NEGATIVE  | NOT TESTE | 0    | Not Tested |                                 |
| 225 | 0 26/09/2019 C | 27 Alive | 15.2 | Myodes glareolus    | Female | adult    | Yes | Yes | Yes | Yes | Yes | 813  | 388  | 169 | 140 | Am | NEGATIVE  | NOT TESTE | 0    | Not Tested |                                 |
| 224 | 0 26/09/2019 D | 38 Alive | 30.1 | Apodemus flaviculus | Male   | adult    | Yes | Yes | Yes | Yes | Yes | 947  | 981  | 246 | 182 | Am | POSITIVE  | NEGATIVE  | 128  | NEGATIVE   |                                 |
| 223 | 0 26/09/2019 D | 33 Dead  | 30   | Apodemus flaviculus | Female | adult    | No  | Yes | Yes | Yes | Yes | 895  | 1120 | 235 | 184 | Am | NEGATIVE  | NOT TESTE | 0    | Not Tested | Mites                           |
| 222 | 0 26/09/2019 D | 29 Alive | 13.7 | Myodes glareolus    | Female | adult    | Yes | Yes | Yes | Yes | Yes | 726  | 413  | 153 | 123 | Am | NEGATIVE  | NOT TESTE | 0    | Not Tested | Little blood drawn              |
| 221 | 0 26/09/2019 D | 37 Alive | 16.2 | Apodemus flaviculus | Male   | adult    | Yes | Yes | Yes | Yes | Yes | 839  | 396  | 171 | 115 | Am | NEGATIVE  | NOT TESTE | 0    | Not Tested |                                 |
| 220 | 1 26/09/2019 D | 21 Alive | 32   | Apodemus flaviculus | Male   | adult    | Yes | Yes | Yes | Yes | Yes | 930  | 1104 | 231 | 180 | Am | POSITIVE  | POSITIVE  | 64   | POSITIVE   | Mites, fleas                    |
| 219 | 0 26/09/2019 D | 46 Alive | 11.7 | Apodemus agrarius   | Female | juvenile | Yes | Yes | Yes | Yes | Yes | 736  | 575  | 167 | 92  | Am | NEGATIVE  | NOT TESTE | 0    | Not Tested | Flea                            |
| 218 | 0 26/09/2019 D | 39 Alive | 18.1 | Myodes glareolus    | Male   | adult    | Yes | Yes | Yes | Yes | Yes | 870  | 461  | 185 | 133 | Am | NEGATIVE  | NOT TESTE | 0    | Not Tested | Moribund                        |
| 217 | 0 26/09/2019 D | 47 Alive | 40.9 | Apodemus flaviculus | Female | adult    | Yes | Yes | Yes | Yes | Yes | 908  | 960  | 246 | 184 | Am | NEGATIVE  | NOT TESTE | 0    | Not Tested | Fleas, mites                    |
| 216 | 0 26/09/2019 D | 28 Alive | 24.5 | Myodes glareolus    | Male   | adult    | Yes | Yes | Yes | Yes | Yes | 742  | 427  | 150 | 128 | Am | NEGATIVE  | NOT TESTE | 0    | Not Tested | Fleas                           |
| 215 | 0 26/09/2019 D | 25 Alive | 11.5 | Myodes glareolus    | Female | adult    | Yes | Yes | Yes | Yes | Yes | 753  | 333  | 170 | 124 | Am | NEGATIVE  | NOT TESTE | 0    | Not Tested | Flea, mites, talpa              |
| 214 | 0 26/09/2019 D | 26 Alive | 27.6 | Apodemus flaviculus | Male   | adult    | Yes | Yes | Yes | Yes | Yes | 896  | 944  | 236 | 177 | Am | NEGATIVE  | NOT TESTE | 0    | Not Tested | Fleas and mites                 |
| 213 | 0 26/09/2019 C | 40 Dead  | 13.9 | Myodes glareolus    | Male   | adult    | No  | Yes | Yes | Yes | Yes | 773  | 410  | 170 | 145 | Am | POSITIVE  | NEGATIVE  | 0    | Not Tested |                                 |
| 212 | 0 26/09/2019 D | 11 Alive | 27.2 | Apodemus flaviculus | Male   | adult    | Yes | Yes | Yes | Yes | Yes | 1010 | 974  | 240 | 174 | Am | NEGATIVE  | NOT TESTE | 0    | Not Tested |                                 |
| 211 | 1 26/09/2019 D | 13 Alive | 27.6 | Apodemus flaviculus | Male   | adult    | Yes | Yes | Yes | Yes | Yes | 1015 | 1056 | 241 | 188 | Am | POSITIVE  | POSITIVE  | 512  | NEGATIVE   |                                 |
| 210 | 1 26/09/2019 D | 6 Alive  | 15.7 | Apodemus agrarius   | Female | adult    | Yes | Yes | Yes | Yes | Yes | 810  | 666  | 184 | 106 | Am | POSITIVE  | POSITIVE  | 128  | POSITIVE   |                                 |
| 209 | 1 26/09/2019 C | 41 Dead  | 13.3 | Myodes glareolus    | Male   | juvenile | No  | Yes | Yes | Yes | Yes | 789  | 355  | 166 | 122 | Am | POSITIVE  | POSITIVE  | 8192 | Not Tested |                                 |
| 208 | 0 26/09/2019 D | 12 Dead  | 14.9 | Apodemus flaviculus | Male   | juvenile | No  | Yes | Yes | Yes | Yes | 753  | 682  | 187 | 225 | Am | NEGATIVE  | NOT TESTE | 0    | Not Tested |                                 |
| 207 | 0 26/09/2019 D | 8 Dead   | 46.3 | Mustela nivalis     | Female | adult    | No  | Yes | Yes | Yes | Yes | 1590 | 436  | 226 | 92  | Am | NOT TESTE | NEGATIVE  | 0    | Not Tested | Weasel, mustela nivalis         |
| 206 | 0 26/09/2019 D | 10 Alive | 20   | Myodes glareolus    | Male   | juvenile | Yes | Yes | Yes | Yes | Yes | 822  | 280  | 170 | 126 | Am | NEGATIVE  | NEGATIVE  | 0    | Not Tested | used kidney for IFA test        |
| 205 | 0 26/09/2019 D | 24 Alive | 13   | Apodemus agrarius   | Male   | juvenile | Yes | Yes | Yes | Yes | Yes | 770  | 653  | 183 | 123 | Am | NEGATIVE  | NOT TESTE | 0    | Not Tested |                                 |
| 204 | 0 26/09/2019 D | 35 Dead  | 25.2 | Apodemus flaviculus | Female | adult    | No  | Yes | Yes | Yes | Yes | 867  | 1041 | 236 | 195 | Am | POSITIVE  | NEGATIVE  | 0    | NEGATIVE   |                                 |
| 203 | 0 26/09/2019 D | 14 Dead  | 31.5 | Apodemus flaviculus | Male   | adult    | No  | Yes | Yes | Yes | Yes | 882  | 979  | 257 | 170 | Am | NEGATIVE  | NOT TESTE | 0    | Not Tested |                                 |
| 202 | 1 26/09/2019 D | 27 Dead  | 12.5 | Microtus arvalis    | Male   | adult    | No  | Yes | Yes | Yes | Yes | 721  | 0    | 148 | 102 | Am | NEGATIVE  | NOT TESTE | 512  | Not Tested | No tail, tested IFA with kidney |
| 201 | 1 26/09/2019 D | 47 Alive | 26.9 | Apodemus flaviculus | Female | adult    | Yes | Yes | Yes | Yes | Yes | 953  | 899  | 237 | 171 | Am | POSITIVE  | POSITIVE  | 8192 | POSITIVE   |                                 |
| 200 | 0 26/09/2019 D | 4 Alive  | 18.3 | Apodemus flaviculus | Male   | juvenile | Yes | Yes | Yes | Yes | Yes | 826  | 900  | 234 | 152 | Am | NEGATIVE  | NOT TESTE | 0    | Not Tested |                                 |
| 199 | 0 26/09/2019 D | 2 Dead   | 14.8 | Apodemus agrarius   | Female | adult    | No  | Yes | Yes | Yes | Yes | 721  | 694  | 176 | 115 | Am | NEGATIVE  | NOT TESTE | 0    | Not Tested |                                 |
| 198 | 0 26/09/2019 D | 1 Alive  | 20.3 | Apodemus flaviculus | Male   | juvenile | Yes | Yes | Yes | Yes | Yes | 875  | 775  | 230 | 183 | Am | NEGATIVE  | NOT TESTE | 0    | Not Tested |                                 |
| 197 | 0 25/09/2019 B | 43 Alive | 18.5 | Myodes glareolus    | Male   | adult    | Yes | Yes | Yes | Yes | Yes | 935  | 365  | 135 | 127 | Pm | NEGATIVE  | NOT TESTE | 0    | Not Tested |                                 |
| 196 | 0 25/09/2019 B | 24 Alive | 15.7 | Myodes glareolus    | Male   | adult    | Yes | Yes | Yes | Yes | Yes | 861  | 361  | 156 | 132 | Pm | NEGATIVE  | NOT TESTE | 0    | Not Tested |                                 |
| 195 | 0 25/09/2019 A | 9 Alive  | 15.1 | Myodes glareolus    | Male   | adult    | Yes | Yes | Yes | Yes | Yes | 856  | 358  | 159 | 142 | Pm | NEGATIVE  | NOT TESTE | 0    | Not Tested |                                 |
| 194 | 0 25/09/2019 E | 33 Alive | 18.7 | Myodes glareolus    | Male   | adult    | Yes | Yes | Yes | Yes | Yes | 892  | 355  | 152 | 146 | Pm | NEGATIVE  | NOT TESTE | 0    | Not Tested |                                 |
| 193 | 0 25/09/2019 D | 48 Alive | 16.1 | Myodes glareolus    | Male   | adult    | Yes | Yes | Yes | Yes | Yes | 874  | 336  | 168 | 144 | Pm | NEGATIVE  | NOT TESTE | 0    | Not Tested |                                 |
| 192 | 0 25/09/2019 D | 31 Alive | 22   | Myodes glareolus    | Male   | adult    | Yes | Yes | Yes | Yes | Yes | 950  | 445  | 173 | 133 | Pm | POSITIVE  | NEGATIVE  | 0    | Not Tested | Fleas                           |
| 191 | 0 25/09/2019 B | 32 Alive | 15.4 | Myodes glareolus    | Male   | juvenile | Yes | Yes | Yes | Yes | Yes | 940  | 368  | 180 | 155 | Pm | NEGATIVE  | NOT TESTE | 0    | Not Tested |                                 |
| 190 | 0 25/09/2019 D | 27 Alive | 15   | Microtus arvalis    | Male   | juvenile | Yes | Yes | Yes | Yes | Yes | 890  | 293  | 165 | 105 | Pm | NEGATIVE  | NOT TESTE | 0    | Not Tested |                                 |
| 189 | 0 25/09/2019 C | 20 Alive | 13.5 | Myodes glareolus    | Male   | adult    | Yes | Yes | Yes | Yes | Yes | 843  | 386  | 160 | 136 | Pm | NEGATIVE  | NOT TESTE | 0    | Not Tested |                                 |
| 188 | 0 25/09/2019 C | 30 Alive | 13.1 | Myodes glareolus    | Male   | adult    | Yes | Yes | Yes | Yes | Yes | 827  | 398  | 163 | 128 | Pm | NEGATIVE  | NOT TESTE | 0    | Not Tested | Fleas                           |
| 187 | 0 25/09/2019 C | 44 Alive | 13.7 | Myodes glareolus    | Male   | adult    | Yes | Yes | Yes | Yes | Yes | 857  | 392  | 179 | 117 | Pm | NEGATIVE  | NOT TESTE | 0    | Not Tested |                                 |

|     |                |          |                            |        |          |     |     |     |     |     |      |      |     |        |          |           |      |                                                 |
|-----|----------------|----------|----------------------------|--------|----------|-----|-----|-----|-----|-----|------|------|-----|--------|----------|-----------|------|-------------------------------------------------|
| 168 | 0 25/09/2019 C | 27 Dead  | 14.3 Apodemus agrarius     | Male   | juvenile | No  | Yes | Yes | Yes | Yes | 767  | 680  | 186 | 115 Am | NEGATIVE | NOT TESTE | 0    | Not Tested                                      |
| 167 | 0 25/09/2019 D | 50 Alive | 16.8 Myodes glareolus      | Male   | adult    | Yes | Yes | Yes | Yes | Yes | 832  | 372  | 175 | 126 Am | NEGATIVE | NOT TESTE | 0    | Not Tested                                      |
| 166 | 0 25/09/2019 D | 11 Dead  | 15.4 Apodemus agrarius     | Male   | adult    | No  | Yes | Yes | Yes | Yes | 778  | 658  | 182 | 115 Am | NEGATIVE | NOT TESTE | 0    | Not Tested Tail with infection                  |
| 165 | 0 25/09/2019 C | 11 Dead  | 15.3 Myodes glareolus      | Male   | adult    | No  | Yes | Yes | Yes | Yes | 813  | 328  | 178 | 127 Am | NEGATIVE | NOT TESTE | 0    | Not Tested                                      |
| 164 | 0 25/09/2019 C | 33 Alive | 22 Myodes glareolus        | Male   | adult    | Yes | Yes | Yes | Yes | Yes | 946  | 378  | 165 | 159 Am | NEGATIVE | NOT TESTE | 0    | Not Tested                                      |
| 163 | 0 25/09/2019 C | 2 Dead   | 15.8 Apodemus agrarius     | Male   | adult    | No  | Yes | Yes | Yes | Yes | 773  | 604  | 190 | 104 Am | NEGATIVE | NEGATIVE  | 0    | Not Tested                                      |
| 162 | 0 25/09/2019 D | 13 Alive | 18.8 Myodes glareolus      | Male   | adult    | Yes | Yes | Yes | Yes | Yes | 875  | 360  | 174 | 130 Am | NEGATIVE | NOT TESTE | 0    | Not Tested                                      |
| 161 | 1 25/09/2019 C | 32 Dead  | 20.3 Myodes glareolus      | Male   | adult    | No  | Yes | Yes | Yes | Yes | 902  | 515  | 166 | 126 Am | POSITIVE | POSITIVE  | 1024 | Not Tested                                      |
| 160 | 1 25/09/2019 C | 10 Alive | 15.3 Apodemus flaviculus   | Male   | juvenile | Yes | Yes | Yes | Yes | Yes | 743  | 835  | 230 | 172 Am | POSITIVE | POSITIVE  | 256  | POSITIVE                                        |
| 159 | 0 25/09/2019 C | 34 Dead  | 14.6 Myodes glareolus      | Male   | adult    | No  | Yes | Yes | Yes | Yes | 764  | 385  | 169 | 128 Am | NEGATIVE | NOT TESTE | 0    | Not Tested                                      |
| 158 | 1 25/09/2019 C | 35 Dead  | 19.1 Myodes glareolus      | Male   | adult    | No  | Yes | Yes | Yes | Yes | 854  | 426  | 155 | 126 Am | POSITIVE | POSITIVE  | 2048 | Not Tested                                      |
| 157 | 1 25/09/2019 C | 36 Alive | 23.2 Apodemus flaviculus   | Male   | adult    | Yes | Yes | Yes | Yes | Yes | 960  | 957  | 252 | 169 Am | POSITIVE | POSITIVE  | 128  | NEGATIVE                                        |
| 156 | 1 25/09/2019 C | 40 Dead  | 12.4 Myodes glareolus      | Male   | juvenile | No  | Yes | Yes | Yes | Yes | 747  | 349  | 175 | 133 Am | POSITIVE | POSITIVE  | 256  | Not Tested                                      |
| 155 | 0 25/09/2019 C | 9 Alive  | 15.2 Myodes glareolus      | Male   | adult    | Yes | Yes | Yes | Yes | Yes | 848  | 397  | 167 | 124 Am | NEGATIVE | NOT TESTE | 0    | Not Tested                                      |
| 154 | 0 25/09/2019 C | 23 Dead  | 13.3 Myodes glareolus      | Male   | juvenile | No  | Yes | Yes | Yes | Yes | 746  | 357  | 163 | 135 Am | POSITIVE | NEGATIVE  | 0    | Not Tested Larva ticks                          |
| 153 | 0 25/09/2019 C | 19 Alive | 20.9 Myodes glareolus      | Male   | adult    | Yes | Yes | Yes | Yes | Yes | 910  | 409  | 165 | 138 Am | NEGATIVE | NOT TESTE | 0    | Not Tested                                      |
| 152 | 0 25/09/2019 D | 37 Dead  | 26.4 Apodemus flaviculus   | Male   | adult    | No  | Yes | Yes | Yes | Yes | 844  | 990  | 244 | 167 Am | NEGATIVE | NOT TESTE | 0    | Not Tested                                      |
| 151 | 0 25/09/2019 C | 5 Alive  | 29 Apodemus flaviculus     | Male   | adult    | Yes | Yes | Yes | Yes | Yes | 996  | 1097 | 223 | 173 Am | NEGATIVE | NOT TESTE | 0    | Not Tested                                      |
| 150 | 0 25/09/2019 C | 37 Dead  | 14.5 Myodes glareolus      | Female | adult    | No  | Yes | Yes | Yes | Yes | 784  | 371  | 170 | 125 Am | NEGATIVE | NOT TESTE | 0    | Not Tested                                      |
| 149 | 0 25/09/2019 D | 38 Alive | 15.2 Myodes glareolus      | Female | adult    | Yes | Yes | Yes | Yes | Yes | 879  | 418  | 160 | 138 Am | NEGATIVE | NOT TESTE | 0    | Not Tested                                      |
| 148 | 0 25/09/2019 D | 39 Dead  | 13.7 Myodes glareolus      | Female | adult    | No  | Yes | Yes | Yes | Yes | 757  | 418  | 148 | 130 Am | NEGATIVE | NOT TESTE | 0    | Not Tested                                      |
| 147 | 0 25/09/2019 D | 49 Alive | 26.6 Apodemus flaviculus   | Female | adult    | Yes | Yes | Yes | Yes | Yes | 1031 | 955  | 221 | 167 Am | NEGATIVE | NOT TESTE | 0    | Not Tested Fleas                                |
| 146 | 0 25/09/2019 D | 35 Dead  | 12.4 Myodes glareolus      | Male   | juvenile | No  | Yes | Yes | Yes | Yes | 735  | 345  | 150 | 112 Am | NEGATIVE | NOT TESTE | 0    | Not Tested                                      |
| 145 | 0 25/09/2019 D | 35 Alive | 13.2 Myodes glareolus      | Male   | juvenile | Yes | Yes | Yes | Yes | Yes | 883  | 346  | 145 | 106 Am | POSITIVE | NEGATIVE  | 0    | Not Tested Moribund                             |
| 144 | 0 25/09/2019 D | 14 Dead  | 14 Myodes glareolus        | Male   | adult    | No  | Yes | Yes | Yes | Yes | 826  | 393  | 150 | 112 Am | NEGATIVE | NOT TESTE | 0    | Not Tested                                      |
| 143 | 0 25/09/2019 D | 16 Alive | 24.3 Apodemus flaviculus   | Male   | adult    | Yes | Yes | Yes | Yes | Yes | 958  | 914  | 232 | 124 Am | NEGATIVE | NOT TESTE | 0    | Not Tested                                      |
| 142 | 1 25/09/2019 D | 3 Dead   | 15 Myodes glareolus        | Female | adult    | No  | Yes | Yes | Yes | Yes | 878  | 454  | 164 | 157 Am | POSITIVE | POSITIVE  | 256  | Not Tested                                      |
| 141 | 0 25/09/2019 D | 12 Alive | 21.5 Apodemus flaviculus   | Male   | juvenile | Yes | Yes | Yes | Yes | Yes | 921  | 896  | 205 | 160 Am | NEGATIVE | NOT TESTE | 0    | Not Tested                                      |
| 140 | 0 25/09/2019 D | 2 Dead   | 26.8 Apodemus flaviculus   | Female | adult    | No  | Yes | Yes | Yes | Yes | 942  | 996  | 203 | 155 Am | NEGATIVE | NOT TESTE | 0    | Not Tested                                      |
| 139 | 1 25/09/2019 D | 7 Alive  | 20.6 Apodemus flaviculus   | Male   | juvenile | Yes | Yes | Yes | Yes | Yes | 887  | 986  | 216 | 170 Am | POSITIVE | POSITIVE  | 64   | NEGATIVE                                        |
| 138 | 1 25/09/2019 D | 6 Dead   | 15.2 Apodemus agrarius     | Male   | adult    | No  | Yes | Yes | Yes | Yes | 741  | 740  | 195 | 122 Am | POSITIVE | POSITIVE  | 1024 | POSITIVE                                        |
| 137 | 0 25/09/2019 B | 41 Alive | 17.5 Myodes glareolus      | Female | adult    | Yes | Yes | Yes | Yes | Yes | 834  | 395  | 145 | 138 Am | NEGATIVE | NOT TESTE | 0    | Not Tested                                      |
| 136 | 0 25/09/2019 D | 1 Dead   | 17.5 Apodemus agrarius     | Male   | adult    | No  | Yes | Yes | Yes | Yes | 860  | 714  | 194 | 101 Am | NEGATIVE | NEGATIVE  | 0    | Not Tested Tail with infection                  |
| 135 | 0 25/09/2019 B | 28 Alive | 33.6 Apodemus flaviculus   | Male   | adult    | Yes | Yes | Yes | Yes | Yes | 1130 | 1046 | 216 | 194 Am | NEGATIVE | NOT TESTE | 0    | Not Tested Fleas                                |
| 134 | 0 25/09/2019 B | 47 Dead  | 40.4 Myodes glareolus      | Male   | adult    | No  | Yes | Yes | Yes | Yes | 852  | 305  | 155 | 120 Am | NEGATIVE | NOT TESTE | 0    | Not Tested                                      |
| 133 | 0 25/09/2019 B | 17 Alive | 41.7 Apodemus flaviculus   | Male   | adult    | Yes | Yes | Yes | Yes | Yes | 1131 | 1062 | 252 | 190 Am | NEGATIVE | NOT TESTE | 0    | Not Tested                                      |
| 132 | 0 25/09/2019 B | 32 Dead  | 12.1 Myodes glareolus      | Female | adult    | No  | Yes | Yes | Yes | Yes | 780  | 410  | 238 | 135 Am | POSITIVE | NEGATIVE  | 0    | Not Tested                                      |
| 131 | 0 25/09/2019 B | 33 Alive | 16.3 Myodes glareolus      | Male   | adult    | Yes | Yes | Yes | Yes | Yes | 879  | 425  | 145 | 99 Am  | NEGATIVE | NOT TESTE | 0    | Not Tested                                      |
| 130 | 0 25/09/2019 B | 24 Dead  | 13.2 Myodes glareolus      | Male   | adult    | No  | Yes | Yes | Yes | Yes | 745  | 415  | 138 | 116 Am | NEGATIVE | NOT TESTE | 0    | Not Tested                                      |
| 129 | 0 25/09/2019 D | 46 Alive | 25.2 Apodemus flaviculus   | Female | adult    | Yes | Yes | Yes | Yes | Yes | 912  | 109  | 225 | 165 Am | NEGATIVE | NOT TESTE | 0    | Not Tested                                      |
| 128 | 0 25/09/2019 B | 22 Alive | 15.4 Myodes glareolus      | Female | adult    | Yes | Yes | Yes | Yes | Yes | 878  | 334  | 132 | 114 Am | NEGATIVE | NOT TESTE | 0    | Not Tested                                      |
| 127 | 0 25/09/2019 A | 7 Dead   | 23.2 Apodemus flaviculus   | Female | adult    | No  | Yes | Yes | Yes | Yes | 870  | 942  | 236 | 165 Am | NEGATIVE | NOT TESTE | 0    | Not Tested                                      |
| 126 | 1 25/09/2019 A | 2 Dead   | 16.9 Myodes glareolus      | Male   | adult    | No  | Yes | Yes | Yes | Yes | 884  | 393  | 143 | 94 Am  | POSITIVE | POSITIVE  | 4096 | Not Tested                                      |
| 125 | 1 25/09/2019 A | 12 Alive | 37.5 Apodemus flaviculus   | Male   | adult    | Yes | Yes | Yes | Yes | Yes | 1072 | 0    | 228 | 183 Am | POSITIVE | POSITIVE  | 512  | NEGATIVE Cut tail, missing age (assumed adult)  |
| 124 | 0 25/09/2019 A | 8 Dead   | 7.1 Sorex minutus          | Female | adult    | No  | Yes | Yes | Yes | Yes | 625  | 267  | 98  | 54 Am  | NEGATIVE | NOT TESTE | 0    | Not Tested Missing age (assumed to be adult)    |
| 123 | 0 25/09/2019 A | 42 Alive | 12.8 Microtus subterraneus | Female | adult    | Yes | Yes | Yes | Yes | Yes | 774  | 250  | 114 | 98 Am  | NEGATIVE | NOT TESTE | 0    | Not Tested Microtus subterraneus                |
| 122 | 0 24/09/2019 B | 24 Alive | 15.4 Myodes glareolus      | Male   | juvenile | Yes | Yes | Yes | Yes | Yes | 804  | 350  | 175 | 123 Pm | NEGATIVE | NOT TESTE | 0    | Not Tested Mites                                |
| 121 | 0 24/09/2019 B | 37 Alive | 17.5 Myodes glareolus      | Male   | juvenile | Yes | Yes | Yes | Yes | Yes | 842  | 394  | 124 | 149 Am | NEGATIVE | NOT TESTE | 0    | Not Tested                                      |
| 120 | 0 24/09/2019 A | 18 Alive | 5.5 Sorex minutus          | Male   | adult    | Yes | Yes | Yes | Yes | Yes | 604  | 349  | 117 | 44 Am  | NEGATIVE | NOT TESTE | 0    | Not Tested                                      |
| 119 | 0 24/09/2019 A | 7 Dead   | 29.1 Apodemus flaviculus   | Male   | adult    | No  | Yes | Yes | Yes | Yes | 923  | 1106 | 238 | 193 Am | POSITIVE | NEGATIVE  | 0    | NEGATIVE                                        |
| 118 | 0 24/09/2019 A | 9 Dead   | 23.4 Apodemus flaviculus   | Male   | adult    | No  | Yes | Yes | Yes | Yes | 911  | 955  | 233 | 186 Am | NEGATIVE | NOT TESTE | 64   | NEGATIVE Mites (gamasid), used kidney for titer |
| 117 | 0 24/09/2019 B | 39 Dead  | 13.8 Myodes glareolus      | Male   | juvenile | No  | Yes | Yes | Yes | Yes | 786  | 327  | 173 | 140 Am | NEGATIVE | NOT TESTE | 0    | Not Tested                                      |
| 116 | 0 24/09/2019 B | 11 Dead  | 12.4 Myodes glareolus      | Male   | juvenile | No  | Yes | Yes | Yes | Yes | 736  | 320  | 145 | 138 Am | NEGATIVE | NOT TESTE | 0    | Not Tested                                      |
| 115 | 0 24/09/2019 B | 29 Dead  | 33.5 Apodemus flaviculus   | Male   | juvenile | No  | Yes | Yes | Yes | Yes | 954  | 960  | 219 | 186 Am | NEGATIVE | NOT TESTE | 0    | Not Tested Mites                                |
| 114 | 0 24/09/2019 B | 7 Dead   | 15.2 Myodes glareolus      | Male   | juvenile | No  | Yes | Yes | Yes | Yes | 810  | 359  | 147 | 139 Am | POSITIVE | NOT TESTE | 128  | Not Tested                                      |
| 113 | 0 24/09/2019 B | 17 Dead  | 15 Myodes glareolus        | Male   | juvenile | No  | Yes | Yes | Yes | Yes | 755  | 394  | 153 | 128 Am | NEGATIVE | NOT TESTE | 0    | Not Tested                                      |
| 112 | 0 24/09/2019 A | 17 Dead  | 23.2 Apodemus flaviculus   | Female | juvenile | No  | Yes | Yes | Yes | Yes | 863  | 1005 | 223 | 169 Am | NEGATIVE | NOT TESTE | 0    | Not Tested                                      |
| 111 | 0 24/09/2019 B | 14 Dead  | 32.7 Apodemus flaviculus   | Female | adult    | No  | Yes | Yes | Yes | Yes | 963  | 992  | 226 | 186 Am | NEGATIVE | NOT TESTE | 0    | Not Tested                                      |
| 110 | 0 24/09/2019 B | 13 Dead  | 34.6 Apodemus flaviculus   | Female | juvenile | No  | Yes | Yes | Yes | Yes | 926  | 1115 | 225 | 187 Am | NEGATIVE | NOT TESTE | 0    | Not Tested                                      |
| 109 | 0 24/09/2019 B | 9 Alive  | 26.4 Apodemus flaviculus   | Male   | juvenile | Yes | Yes | Yes | Yes | Yes | 1028 | 947  | 244 | 170 Am | NEGATIVE | NOT TESTE | 0    | Not Tested                                      |
| 108 | 0 24/09/2019 B | 23 Dead  | 14.5 Myodes glareolus      | Male   | juvenile | No  | Yes | Yes | Yes | Yes | 710  | 340  | 166 | 150 Am | NEGATIVE | NOT TESTE | 0    | Not Tested Ectoparasites                        |
| 107 | 0 24/09/2019 B | 8 Alive  | 16.2 Myodes glareolus      | Male   | juvenile | Yes | Yes | Yes | Yes | Yes | 870  | 458  | 145 | 153 Am | POSITIVE | NEGATIVE  | 0    | Not Tested                                      |
| 106 | 0 24/09/2019 A | 5 Dead   | 32.2 Apodemus flaviculus   | Female | adult    | No  | Yes | Yes | Yes | Yes | 936  | 1003 | 237 | 183 Am | NEGATIVE | NOT TESTE | 0    | Not Tested                                      |
| 105 | 0 24/09/2019 A | 46 Alive | 22.2 Apodemus flaviculus   | Male   | juvenile | Yes | Yes | Yes | Yes | Yes | 940  | 862  | 243 | 152 Am | NEGATIVE | NOT TESTE | 0    | Not Tested                                      |
| 104 | 0 24/09/2019 A | 49 Dead  | 14.1 Myodes glareolus      | Male   | juvenile | No  | Yes | Yes | Yes | Yes | 746  | 424  | 125 | 126 Am | NEGATIVE | NOT TESTE | 0    | Not Tested                                      |
| 103 | 0 24/09/2019 A | 34 Alive | 30.6 Apodemus flaviculus   | Male   | adult    | Yes | Yes | Yes | Yes | Yes | 1056 | 1042 | 249 | 157 Am | NEGATIVE | NOT TESTE | 0    | Not Tested                                      |
| 102 | 0 24/09/2019 A | 40 Alive | 16.2 Myodes glareolus      | Male   | juvenile | Yes | Yes | Yes | Yes | Yes | 875  | 374  | 137 | 92 Am  | NEGATIVE | NOT TESTE | 0    | Not Tested                                      |
| 101 | 0 24/09/2019 B | 25 Alive | 18 Myodes glareolus        | Male   | adult    | Yes | Yes | Yes | Yes | Yes | 925  | 424  | 138 | 135 Am | NEGATIVE | NOT TESTE | 0    | Not Tested                                      |
| 181 | 0 25/09/2019 D | 42 Alive | 15.3 Myodes glareolus      | Male   | adult    | Yes | Yes | Yes | Yes | Yes | 835  | 348  | 159 | 112 Am | NEGATIVE | NOT TESTE | 0    | Not Tested                                      |
| 100 | 0 24/09/2019 B | 33 Alive | 38.6 Apodemus flaviculus   | Male   | juvenile | Yes | Yes | Yes | Yes | Yes | 1143 | 1150 | 243 | 193 Am | NEGATIVE | NOT TESTE | 0    | Not Tested none                                 |
