# Supplementary material for: Prevalence of Hantaviruses Harbored by Murid Rodents in Northwestern Ukraine and Discovery of a Novel Puumala Virus Strain
Source: MDPI journal article supplement (doi:10.3390/v13081640), 2021-08-18
Supplement: s1 [file s1]

**Table S2. Line and day success rate**

| Line | N of traps | Date of collection | Morning or afternoon collection | Animals caught (data sheets) | Total per day (animals, data sheets) | Alive (field collection team) | Day N for a trap |
|------|------------|--------------------|---------------------------------|------------------------------|--------------------------------------|-------------------------------|------------------|
| A    | 50         | 24-Sep             | morning                         | 8                            | 9 no data                            |                               | 1                |
| A    | 42         | 24-Sep             | afternoon                       | 1                            | no data                              |                               | 1                |
| A    | 50         | 25-Sep             | morning                         | 5                            | 6 no data                            |                               | 2                |
| A    | 45         | 25-Sep             | afternoon                       | 1                            | no data                              |                               | 2                |
| A    | 50         | 26-Sep             | morning                         | 9                            | 24 no data                           |                               | 3                |
| A    | 41         | 26-Sep             | afternoon                       | 15                           | no data                              |                               | 3                |
| B    | 39         | 24-Sep             | morning                         | 12                           | 14 no data                           |                               | 1                |
| B    | 27         | 24-Sep             | afternoon                       | 2                            | no data                              |                               | 1                |
| B    | 48         | 25-Sep             | morning                         | 8                            | 12 no data                           |                               | 2                |
| B    | 40         | 25-Sep             | afternoon                       | 4                            | no data                              |                               | 2                |
| B    | 50         | 26-Sep             | morning                         | 15                           | 15 no data                           |                               | 3                |
| B    | 35         | 26-Sep             | afternoon                       | 0                            | N/A                                  |                               | 3                |
| C    | 50         | 25-Sep             | morning                         | 19                           | 25 no data                           |                               | 1                |
| C    | 31         | 25-Sep             | afternoon                       | 6                            | no data                              |                               | 1                |
| C    | 50         | 26-Sep             | morning                         | 19                           | 19 no data                           |                               | 2                |
| C    | 31         | 26-Sep             | afternoon                       | 0                            | N/A                                  |                               | 2                |
| C    | 50         | 29-Sep             | morning                         | 18                           | 18                                   | 8                             | 3                |
| C    | 32         | 29-Sep             | afternoon                       | 0                            | N/A                                  |                               | 3                |
| C    | 50         | 30-Sep             | morning                         | 15                           | 15                                   | 6                             | 4                |
| C    | 35         | 30-Sep             | afternoon                       | 0                            | N/A                                  |                               | 4                |
| C    | 50         | 1-Oct              | morning                         | 6                            | 6                                    | 4                             | 5                |
| C    | 44         | 1-Oct              | afternoon                       |                              |                                      |                               | 5                |
| D    | 50         | 25-Sep             | morning                         | 29                           | 32 no data                           |                               | 1                |
| D    | 21         | 25-Sep             | afternoon                       | 3                            | no data                              |                               | 1                |
| D    | 50         | 26-Sep             | morning                         | 26                           | 26 no data                           |                               | 2                |
| D    | 24         | 26-Sep             | afternoon                       | 0                            | N/A                                  |                               | 2                |
| D    | 50         | 29-Sep             | morning                         | 20                           | 20                                   | 15                            | 3                |
| D    | 30         | 29-Sep             | afternoon                       | 0                            | N/A                                  |                               | 3                |
| D    | 50         | 30-Sep             | morning                         | 20                           | 20                                   | 13                            | 4                |
| D    | 30         | 30-Sep             | afternoon                       | 0                            | N/A                                  |                               | 4                |
| D    | 50         | 1-Oct              | morning                         | 11                           |                                      | 4                             | 5                |
| D    | 39         | 1-Oct              | afternoon                       |                              |                                      |                               | 5                |
| E    | 25         | 29-Sep             | morning                         | 13                           | 13                                   | 10                            | 1                |
| E    | 12         | 29-Sep             | afternoon                       | 0                            | N/A                                  |                               | 1                |
| E    | 25         | 30-Sep             | morning                         | 8                            | 8                                    | 6                             | 2                |
| E    | 17         | 30-Sep             | afternoon                       | 0                            | N/A                                  |                               | 2                |
| E    | 25         | 1-Oct              | morning                         | 9                            |                                      | 5                             | 3                |
| E    | 16         | 1-Oct              | afternoon                       |                              |                                      |                               | 3                |
| F    | 25         | 29-Sep             | morning                         | 14                           | 15                                   | 12                            | 1                |
| F    | 11         | 29-Sep             | afternoon                       | 1                            |                                      | 1                             | 1                |

|      |    |                  |            |       |            |   |
|------|----|------------------|------------|-------|------------|---|
| F    | 25 | 30-Sep morning   | 9          | 9     | 6          | 2 |
| F    | 16 | 30-Sep afternoon | 0          | N/A   |            | 2 |
| F    | 25 | 1-Oct morning    | 8          |       | 5          | 3 |
| F    | 17 | 1-Oct afternoon  |            |       |            | 3 |
| G    | 25 | 29-Sep morning   | 6          | 7     | 3          | 1 |
| G    | 19 | 29-Sep afternoon | 1          |       | 0          | 1 |
| G    | 25 | 30-Sep morning   | 10         | 10    | 3          | 2 |
| G    | 15 | 30-Sep afternoon | 0          | N/A   |            | 2 |
| G    | 25 | 1-Oct morning    | 5          |       | 2          | 3 |
| G    | 20 | 1-Oct afternoon  |            |       |            | 3 |
| H(a) | 25 | 29-Sep morning   | 1          | 2 N/A |            | 1 |
| H(a) | 24 | 29-Sep afternoon | 1          |       | 1          | 1 |
| H(b) | 25 | 30-Sep morning   | 12         | 12    | 11         | 1 |
| H(b) | 13 | 30-Sep afternoon | 0          | N/A   |            | 1 |
| H(b) | 25 | 1-Oct morning    | 8          |       | 6          | 2 |
| H(b) | 17 | 1-Oct afternoon  |            |       |            | 2 |
|      |    |                  | <b>378</b> |       | <b>121</b> |   |

| Success rate<br>morning /<br>afternoon | Success<br>rate per<br>day | Comment |
|----------------------------------------|----------------------------|---------|
|----------------------------------------|----------------------------|---------|

|       |       |  |
|-------|-------|--|
| 16.0% | 18.0% |  |
|-------|-------|--|

|      |     |  |
|------|-----|--|
| 2.4% | N/A |  |
|------|-----|--|

|       |       |  |
|-------|-------|--|
| 10.0% | 12.0% |  |
|-------|-------|--|

|      |     |  |
|------|-----|--|
| 2.2% | N/A |  |
|------|-----|--|

|       |       |  |
|-------|-------|--|
| 18.0% | 48.0% |  |
|-------|-------|--|

|       |     |  |
|-------|-----|--|
| 36.6% | N/A |  |
|-------|-----|--|

|       |       |  |
|-------|-------|--|
| 30.8% | 35.9% |  |
|-------|-------|--|

|      |     |  |
|------|-----|--|
| 7.4% | N/A |  |
|------|-----|--|

|       |       |  |
|-------|-------|--|
| 16.7% | 25.0% |  |
|-------|-------|--|

|       |     |  |
|-------|-----|--|
| 10.0% | N/A |  |
|-------|-----|--|

|       |       |  |
|-------|-------|--|
| 30.0% | 30.0% |  |
|-------|-------|--|

|      |     |  |
|------|-----|--|
| 0.0% | N/A |  |
|------|-----|--|

|       |       |  |
|-------|-------|--|
| 38.0% | 50.0% |  |
|-------|-------|--|

|       |     |  |
|-------|-----|--|
| 19.4% | N/A |  |
|-------|-----|--|

|       |       |  |
|-------|-------|--|
| 38.0% | 38.0% |  |
|-------|-------|--|

|      |     |  |
|------|-----|--|
| 0.0% | N/A |  |
|------|-----|--|

|       |       |  |
|-------|-------|--|
| 36.0% | 36.0% |  |
|-------|-------|--|

|      |     |  |
|------|-----|--|
| 0.0% | N/A |  |
|------|-----|--|

|       |       |  |
|-------|-------|--|
| 30.0% | 30.0% |  |
|-------|-------|--|

|      |     |  |
|------|-----|--|
| 0.0% | N/A |  |
|------|-----|--|

|       |  |  |
|-------|--|--|
| 12.0% |  |  |
|-------|--|--|

|       |       |  |
|-------|-------|--|
| 58.0% | 64.0% |  |
|-------|-------|--|

|       |     |  |
|-------|-----|--|
| 14.3% | N/A |  |
|-------|-----|--|

|       |       |  |
|-------|-------|--|
| 52.0% | 52.0% |  |
|-------|-------|--|

|      |     |  |
|------|-----|--|
| 0.0% | N/A |  |
|------|-----|--|

|       |       |  |
|-------|-------|--|
| 40.0% | 40.0% |  |
|-------|-------|--|

|      |     |  |
|------|-----|--|
| 0.0% | N/A |  |
|------|-----|--|

|       |       |  |
|-------|-------|--|
| 40.0% | 40.0% |  |
|-------|-------|--|

|      |     |  |
|------|-----|--|
| 0.0% | N/A |  |
|------|-----|--|

|       |  |  |
|-------|--|--|
| 22.0% |  |  |
|-------|--|--|

|       |       |  |
|-------|-------|--|
| 52.0% | 52.0% |  |
|-------|-------|--|

|      |     |  |
|------|-----|--|
| 0.0% | N/A |  |
|------|-----|--|

|       |       |  |
|-------|-------|--|
| 32.0% | 32.0% |  |
|-------|-------|--|

|      |     |  |
|------|-----|--|
| 0.0% | N/A |  |
|------|-----|--|

|       |  |  |
|-------|--|--|
| 36.0% |  |  |
|-------|--|--|

|       |       |  |
|-------|-------|--|
| 56.0% | 60.0% |  |
|-------|-------|--|

|      |     |  |
|------|-----|--|
| 9.1% | N/A |  |
|------|-----|--|

36.0% 36.0%  
0.0% N/A  
32.0%

24.0% 28.0%  
5.3% N/A  
40.0% 40.0%  
0.0% N/A  
20.0%

4.0% 8.0% total from field: 0 (No. 343)  
4.2% N/A  
48.0% 48.0%  
0.0% N/A  
32.0%

total in data sheets: 379
