# Supplementary material for: Prevalence of Hantaviruses Harbored by Murid Rodents in Northwestern Ukraine and Discovery of a Novel Puumala Virus Strain
Source: MDPI journal article supplement (doi:10.3390/v13081640), 2021-08-18
Supplement: s1 [file s1]

Table S5. NGS depth of coverage of conserved S-, M-, L-segment sites in Ukraine isolates from sequenced vRNA. \* represents sites of low coverage that did not have enough depth of coverage to report. M.g. (*Myodes glareolus* )

|               |                         |           |       |            |            |       |           |        |        |           |        |        |
|---------------|-------------------------|-----------|-------|------------|------------|-------|-----------|--------|--------|-----------|--------|--------|
| Animal ID No. | Puumala virus Gene      | S segment |       | M segment  |            |       | L segment |        |        |           |        |        |
|               | Amino acid substitution | N168K     | Q428H | Q/R/I/M57K | G/T/S78A   | S185A | N/T244S   | L759F  | S761G  | Q/R/H777L | S1646A | D2140E |
|               | M.g. 274                | 13305X    | 45X   | 538X       | 1174-1429X | 14X   | 6X        | 24X    | 24X    | 58X       | *      | *      |
|               | M.g. 272                | 7x        | *     | 6X         | 2-4X       | *     | *         | *      | *      | 39X       | *      | *      |
|               | M.g. 209                | 4222X     | 1080X | 62X        | 132-142X   | 32X   | 47X       | 5X     | 5X     | 1045X     | 13X    | 1X     |
|               | M.g. 252                | 5X        | *     | 4X         | 5-6X       | *     | *         | 9X     | 9X     | 116X      | *      | *      |
|               | M.g. 394                | 2373X     | 112X  | 1X         | 173-213X   | 159X  | 647X      | 1463X  | 1458X  | 169X      | 2X     | *      |
|               | M.g. 156                | 10168X    | 4425X | 480X       | 1264-1422X | 372X  | 391X      | 28X    | 28X    | 4376X     | 35X    | 21X    |
|               | M.g. 256                | 16241X    | 1672X | 689X       | 1418X      | 264X  | 6X        | 29X    | 29X    | 9028X     | 38X    | 7X     |
|               | M.g. 258                | 613X      | 290X  | 4X         | 9-11X      | 4X    | *         | 15X    | 15X    | 310X      | *      | *      |
|               | M.g. 400                | 473X      | 66X   | *          | 21-23X     | 29X   | 145X      | 398X   | 398X   | 24X       | *      | *      |
|               | M.g. 355                | 358X      | 17X   | *          | 17-22X     | 24X   | 3X        | 111X   | 111X   | 21X       | *      | *      |
|               | M.g. 412                | 1980X     | 3X    | *          | 84-95X     | 50X   | 285X      | 821X   | 822X   | 2X        | *      | *      |
|               | M.g. 321                | 523X      | *     | *          | 40-47X     | *     | 10X       | 10997X | 10994X | 49X       | *      | *      |
|               | M.g. 416                | 6581X     | *     | *          | 166-222X   | 983X  | 3357X     | 3434X  | 3432X  | 19X       | *      | 3X     |
|               | M.g. 243                | 59X       | *     | 1X         | 2-4X       | *     | 2X        | 5X     | 5X     | 318X      | *      | *      |
|               | M.g. 338                | 2X        | 1X    | *          | 1X         | *     | *         | 25X    | 25X    | 10X       | *      | *      |
|               | M.g. 169                | 6366X     | 1551X | 237X       | 540-650X   | 106X  | 46X       | 9X     | 9X     | 1627X     | 3X     | *      |
|               | M.g. 158                | 1X        | 1X    | 28X        | 47-55X     | *     | *         | *      | *      | 17X       | *      | *      |
|               | M.g. 142                | 2796X     | *     | 27X        | 64-80X     | *     | *         | 2X     | 2X     | 884X      | *      | *      |
